# Supplementary material
Source: publisher site journal article supplement (https://www.dovepress.com/article/339889)
Supplement: Supplementary file 1 [file get_supplementary_file.php]

| <b>Table of Contents</b> |                                                                                                        | <b>Page</b> |
|--------------------------|--------------------------------------------------------------------------------------------------------|-------------|
| <b>Figure S1:</b>        | Consort diagrams                                                                                       |             |
|                          | 1A $\geq 300$ cells/ $\mu$ L blood                                                                     | 2           |
|                          | 1B $\geq 150$ cells/ $\mu$ L blood                                                                     | 3           |
|                          | 1C $\geq 3\%$ of White Blood Cell count                                                                | 4           |
| <b>Figure S2:</b>        | Adjusted AECOPD incidence rate ratios                                                                  |             |
|                          | 2A $\geq 150$ cells/ $\mu$ L blood                                                                     | 5           |
|                          | 2B $\geq 3\%$ of White Blood Cell count                                                                | 6           |
| <b>Figure S3:</b>        | Adjusted Annual AECOPD rates                                                                           |             |
|                          | 3A $< 300$ cells/ $\mu$ L blood                                                                        | 7           |
|                          | 3B $\geq 150$ cells/ $\mu$ L blood                                                                     | 7           |
|                          | 3C $< 150$ cells/ $\mu$ L blood                                                                        | 8           |
|                          | 3D $\geq 3\%$ of White Blood Cell count                                                                | 8           |
|                          | 3E $< 3\%$ of White Blood Cell count                                                                   | 9           |
| <b>Figure S4:</b>        | Time to first AECOPD in participants with eosinophil counts $\geq 300$ cells/ $\mu$ L                  |             |
|                          | 4A All events                                                                                          | 10          |
|                          | 4B Mild events                                                                                         | 10          |
|                          | 4C Moderate events                                                                                     | 11          |
|                          | 4D Severe events                                                                                       | 11          |
| <b>Figure S5</b>         | Time to first AECOPD in participants with eosinophil counts $\geq 150$ cells/ $\mu$ L                  |             |
|                          | 5A Moderate-Severe events                                                                              | 12          |
|                          | 5B All events                                                                                          | 12          |
|                          | 5C Mild events                                                                                         | 13          |
|                          | 5D Moderate events                                                                                     | 13          |
|                          | 5E Severe events                                                                                       | 14          |
| <b>Figure S6</b>         | Time to first AECOPD in participants with eosinophil counts $\geq 3\%$ of total white blood cell count |             |
|                          | 6A Moderate-Severe events                                                                              | 15          |
|                          | 6B All events                                                                                          | 15          |
|                          | 6C Mild events                                                                                         | 16          |
|                          | 6D Moderate events                                                                                     | 16          |
|                          | 6E Severe events                                                                                       | 17          |
| <b>Table S1:</b>         | Secondary outcomes                                                                                     |             |
|                          | 1A $\geq 150$ cells/ $\mu$ L                                                                           | 18          |
|                          | 1B $\geq 3\%$ of White Blood Cell count                                                                | 19          |
| <b>Table S2:</b>         | Intra-treatment comparison                                                                             |             |
|                          | 2A $\geq 300$ cells/ $\mu$ L blood                                                                     | 20          |
|                          | 2B $< 300$ cells/ $\mu$ L blood                                                                        | 20          |
| <b>Table S3</b>          | Univariate predictors of eosinophilic status                                                           |             |
|                          | 3A Continuous blood eosinophil count                                                                   | 21          |
|                          | 3B $\geq 300$ cells/ $\mu$ L blood                                                                     | 22          |
|                          | 3C $\geq 150$ cells/ $\mu$ L blood                                                                     | 23          |
|                          | 3D $\geq 3\%$ of White Blood Cell count                                                                | 24          |
| <b>Table S4</b>          | TASCS Site and Principal Investigator List                                                             | 25          |

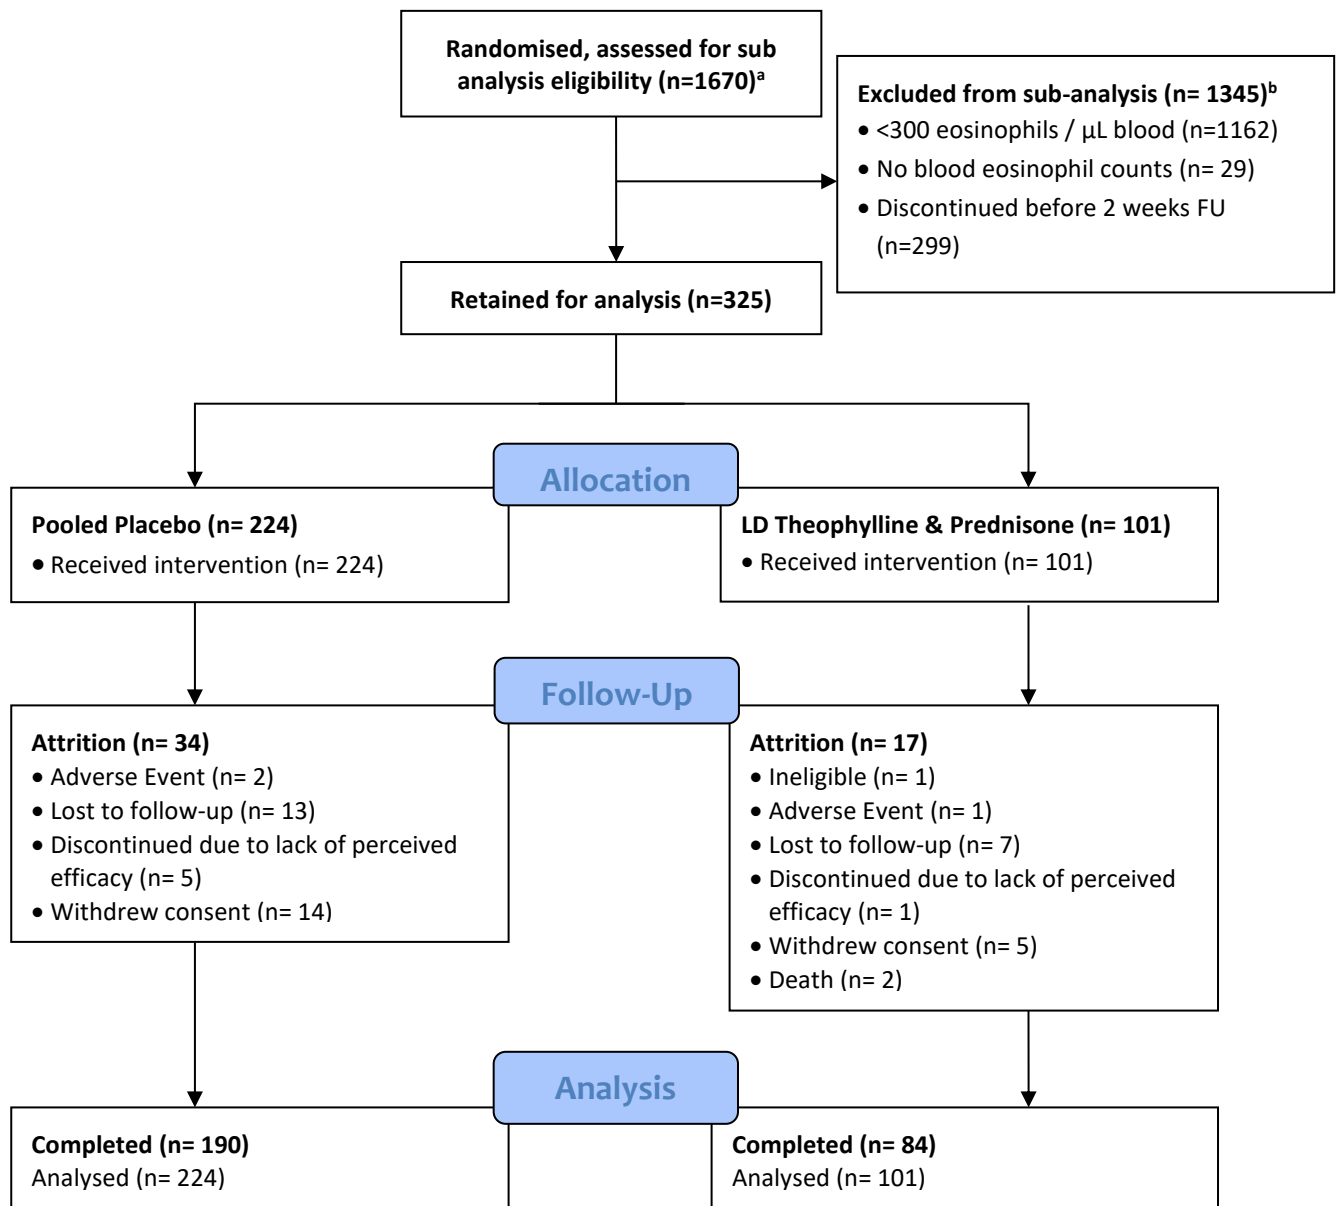

<sup>a</sup> of all participants originally randomized into the trial

<sup>b</sup> participants may have been excluded due to violating more than one of the pre-specified secondary analysis inclusion criteria

**Figure S1A:** consort diagram for eligible participant flow from randomisation, assessment of patient post-hoc analysis to study completion for participants with a blood eosinophil count  $\geq 300$  cells/ $\mu$ L blood.

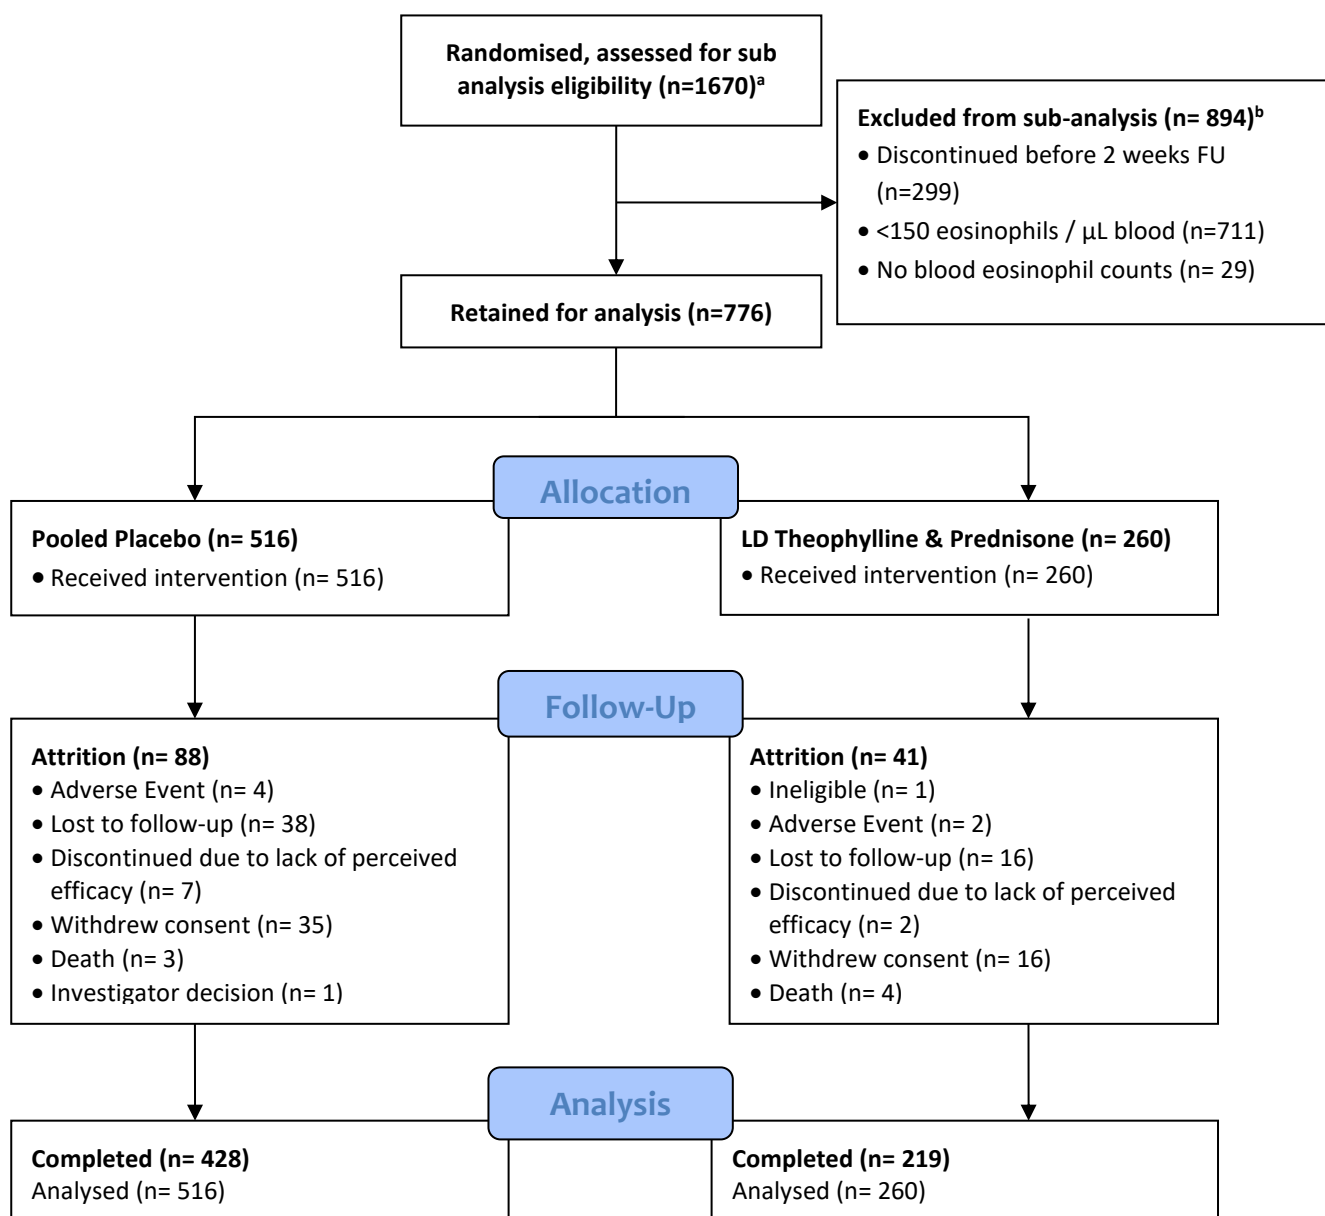

<sup>a</sup> of all participants originally randomized into the trial

<sup>b</sup> participants may have been excluded due to violating more than one of the pre-specified secondary analysis inclusion criteria

**Figure S1B:** consort diagram for eligible participant flow from randomisation, assessment of patient post-hoc analysis to study completion for participants with a blood eosinophil count  $\geq 150$  cells/ $\mu\text{L}$  blood.

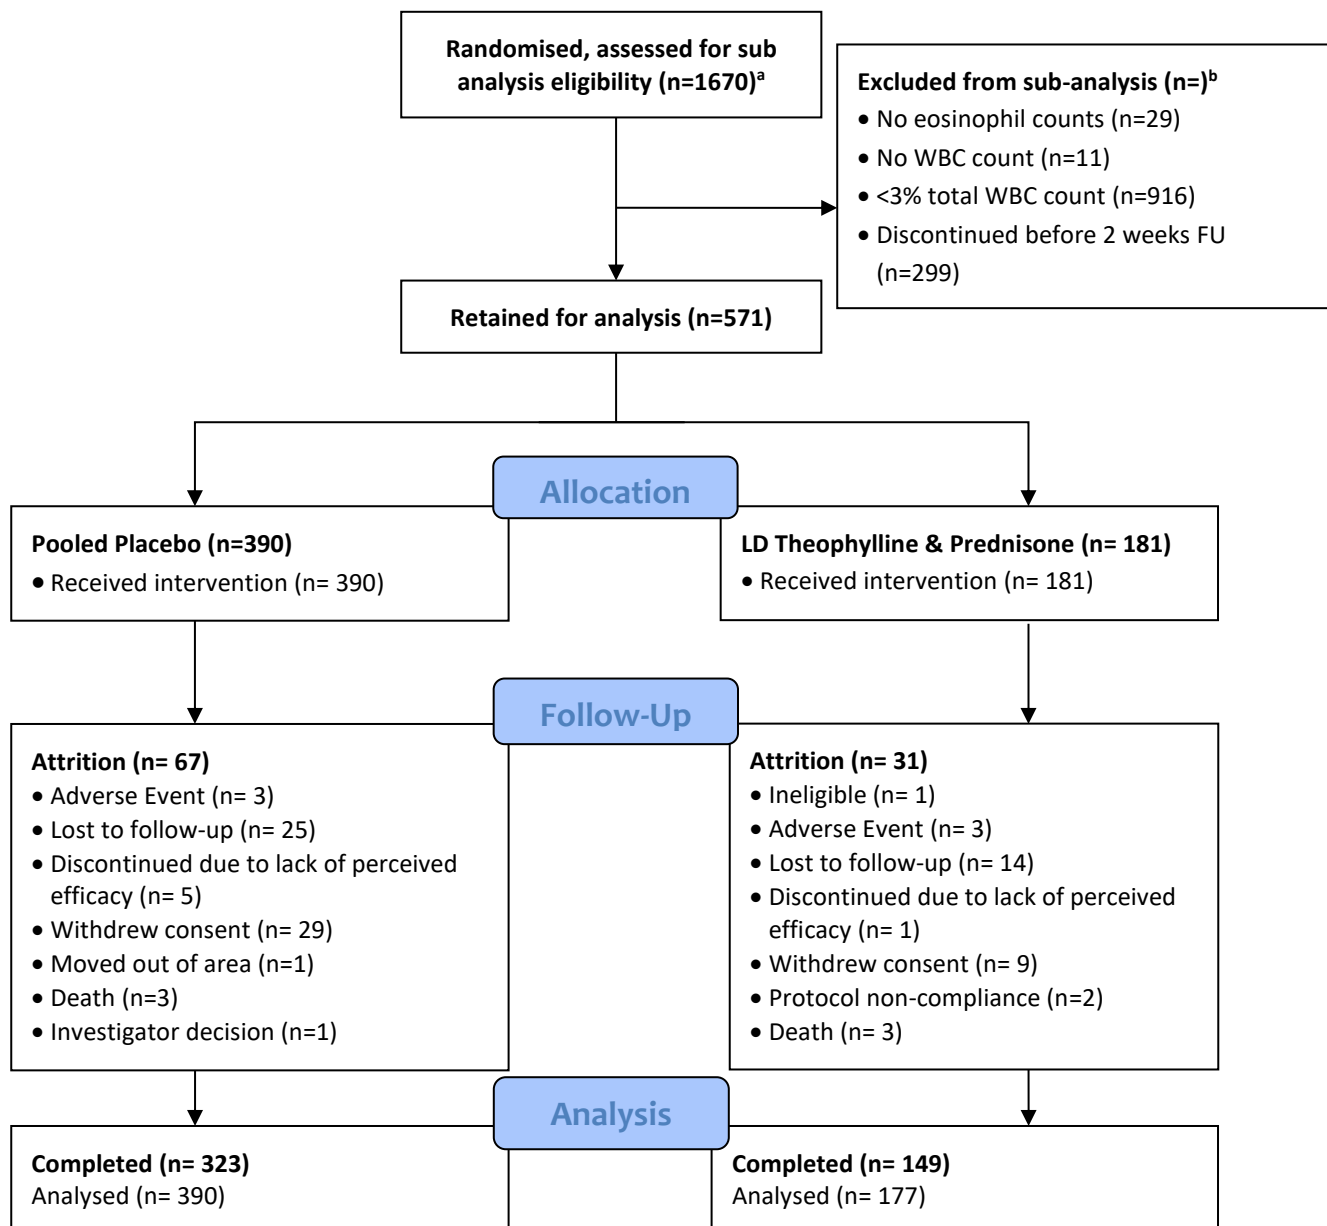

<sup>a</sup> of all participants originally randomized into the trial

<sup>b</sup> participants may have been excluded due to violating more than one of the pre-specified secondary analysis inclusion criteria

**Figure S1C:** consort diagram for eligible participant flow from randomisation, assessment of patient post-hoc analysis to study completion for participants with a blood eosinophil count  $\geq 3\%$  of the total white blood cell count.

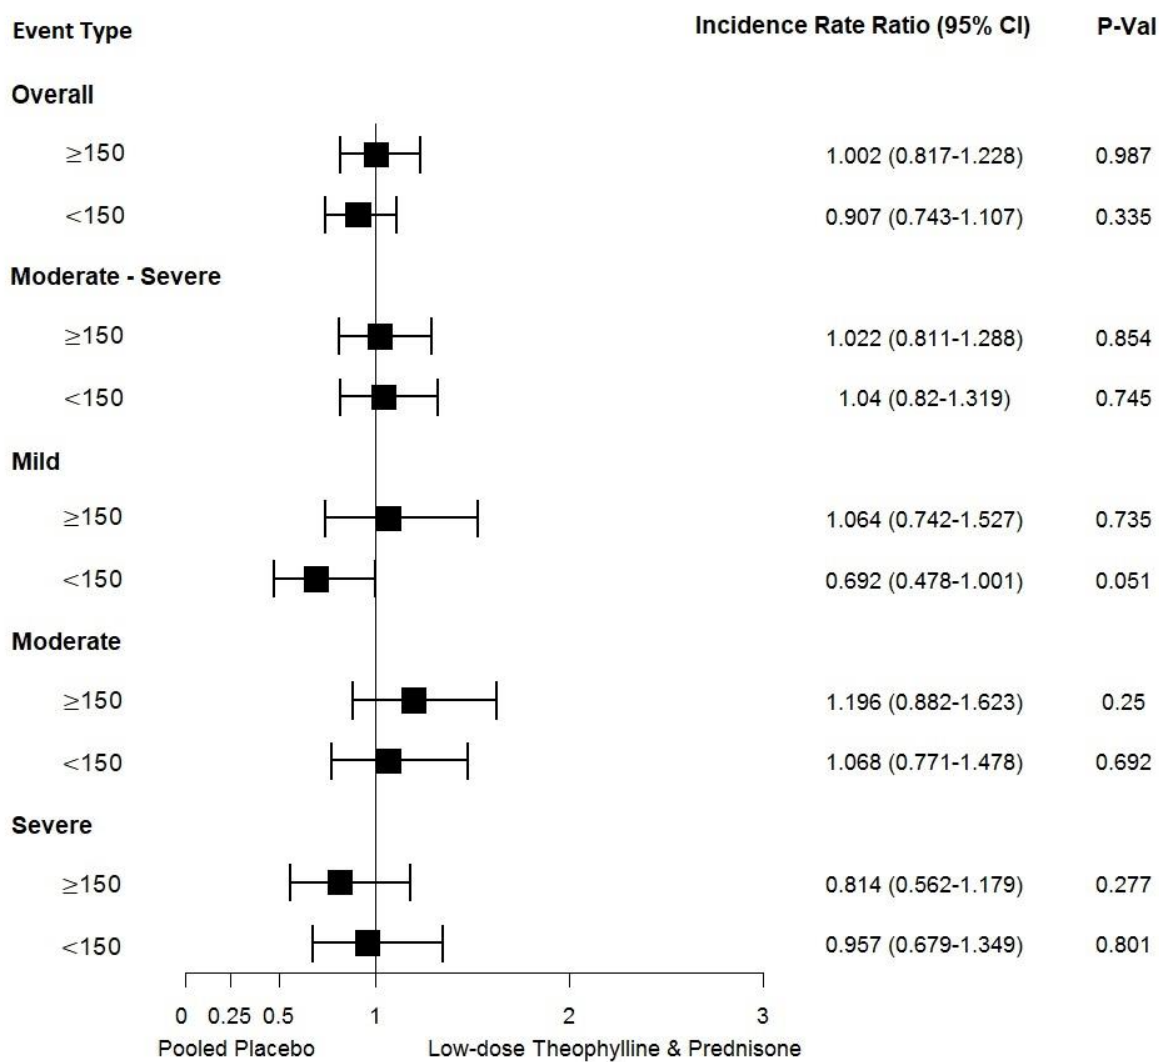

**Figure S2A:** Incidence Rate Ratios (95% CI) of acute exacerbations of chronic obstructive pulmonary disease between Prednisone & Theophylline and Pooled Placebo study arms in participants with blood eosinophil counts  $\geq 150$  cells/ $\mu\text{L}$ , derived from a multi-level mixed effects model

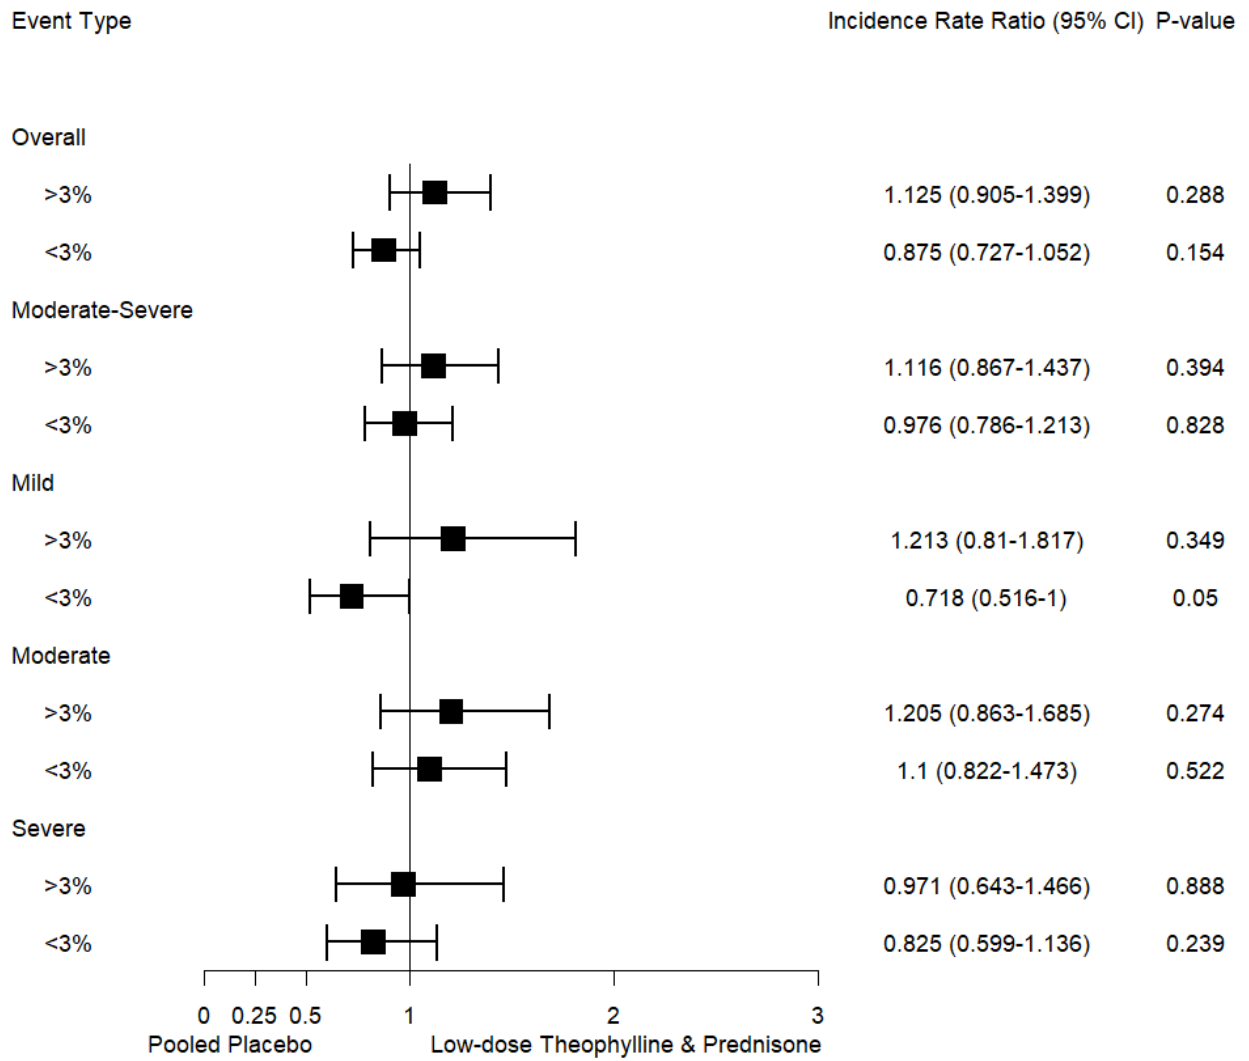

**Figure S2B:** Incidence Rate Ratios (95% CI) of acute exacerbations of chronic obstructive pulmonary disease between Prednisone & Theophylline and Pooled Placebo study arms in participants with blood eosinophil counts  $\geq 3\%$  total white blood cell count, derived from a multi-level mixed effects model

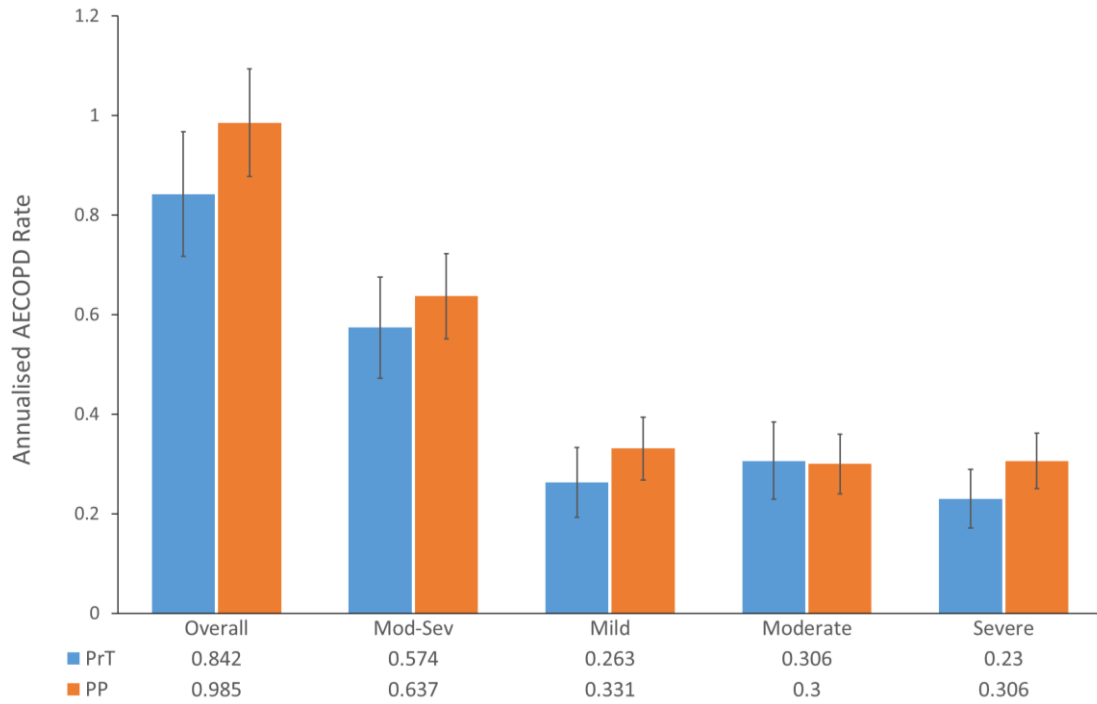

**Figure S3A:** Adjusted annualised AECOPD rates, stratified by severity, for patients with blood eosinophil counts <300 cells/μL between Prednisone & Theophylline (PrT) and Pooled Placebo (PP) treatment groups.

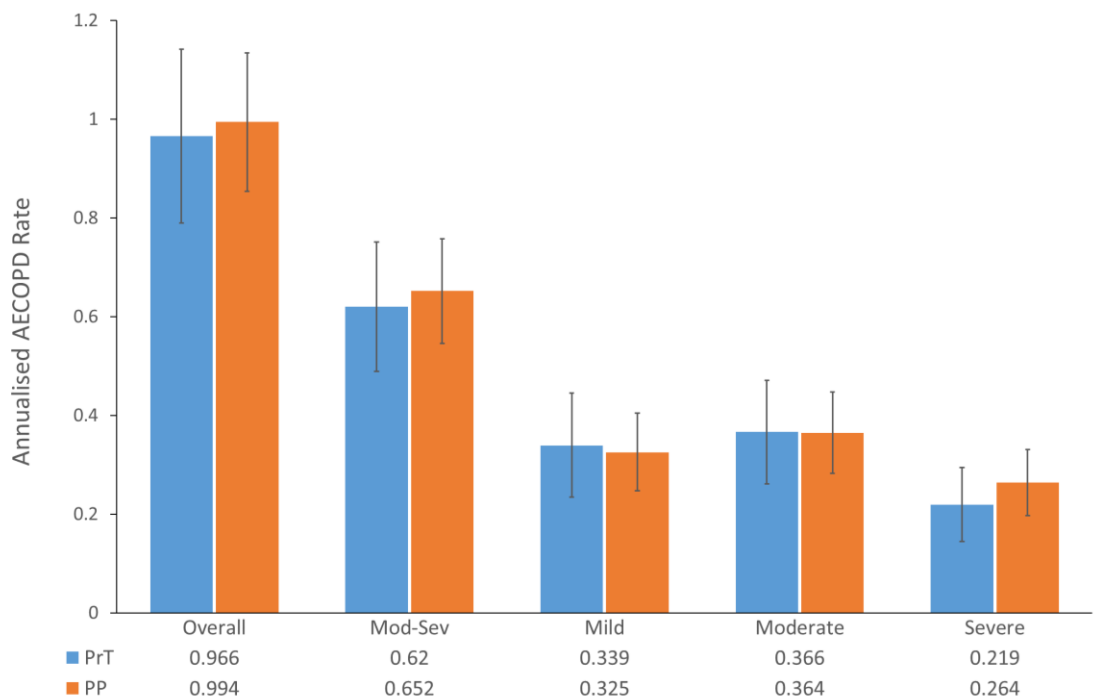

**Figure S3B:** Adjusted annualised AECOPD rates, stratified by severity, for patients with blood eosinophil counts ≥150x10 cells/μL between Prednisone & Theophylline (PrT) and Pooled Placebo (PP) treatment groups.

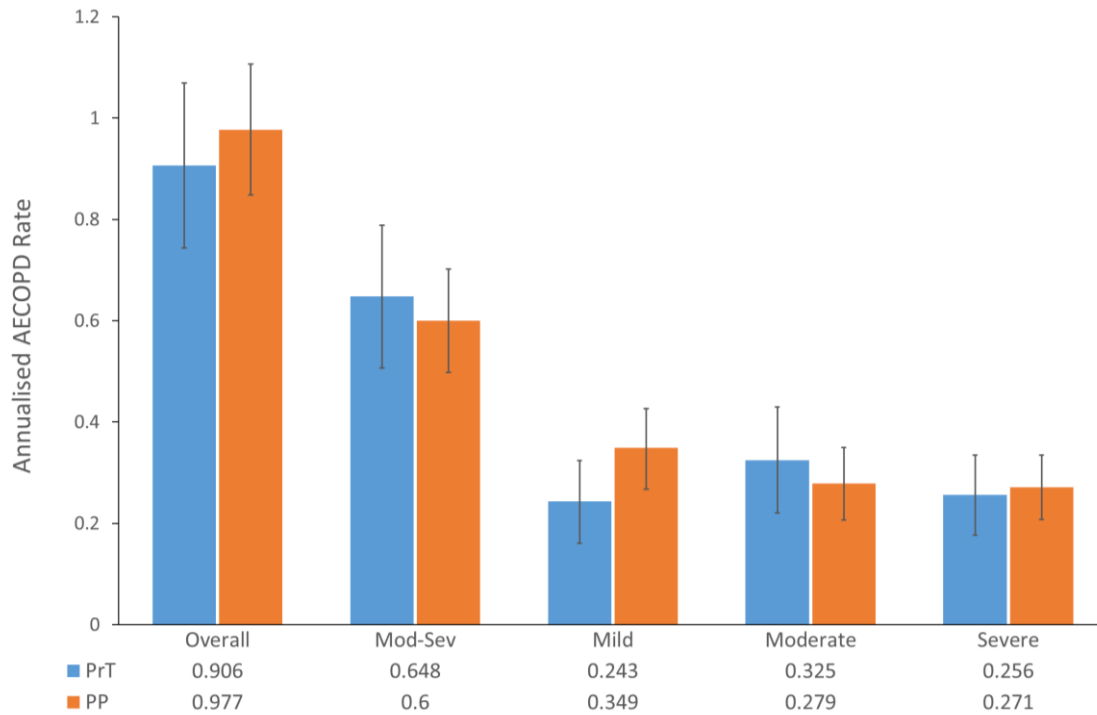

**Figure S3C:** Adjusted annualised AECOPD rates, stratified by severity, for patients with blood eosinophil counts <150x10 cells/μL between Prednisone & Theophylline (PrT) and Pooled Placebo (PP) treatment groups.

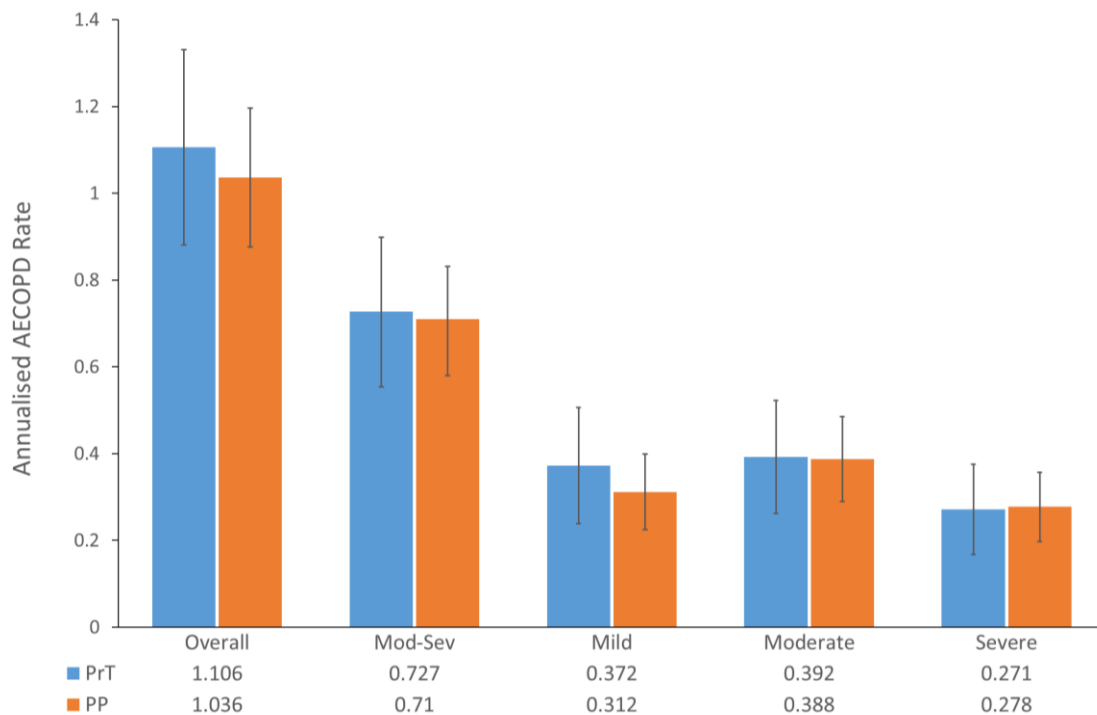

**Figure S3D:** Adjusted annualised AECOPD rates, stratified by severity, for patients with blood eosinophil counts ≥3% of the total white blood cell count, between Prednisone & Theophylline (PrT) and Pooled Placebo (PP) treatment groups.



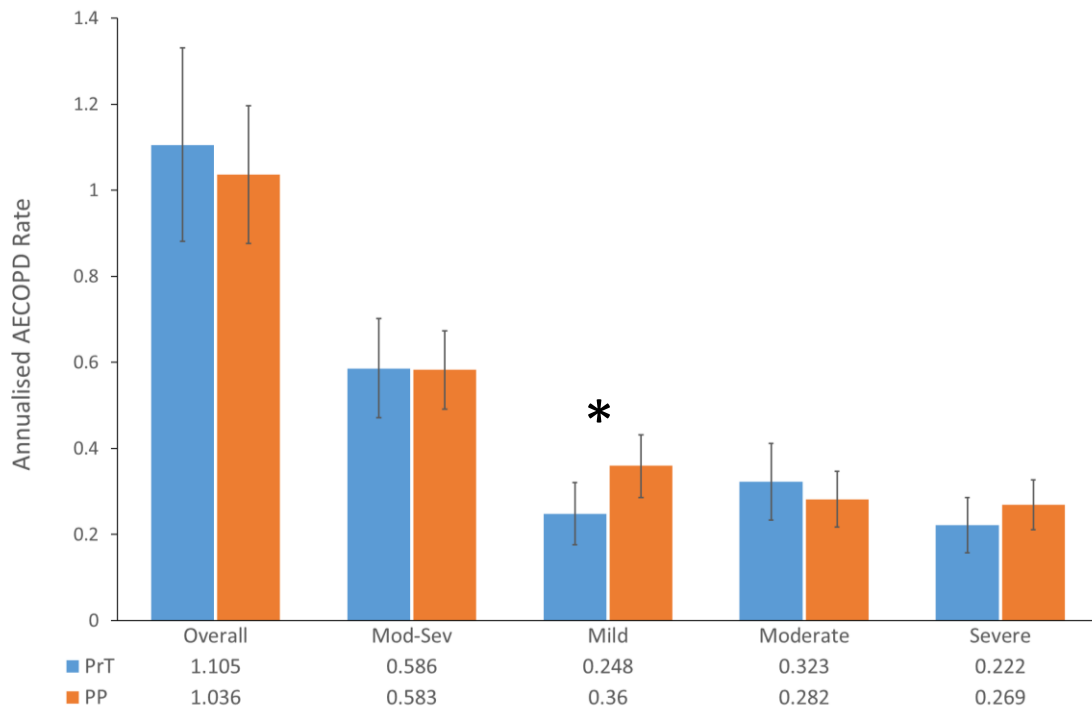

\* p<0.05

**Figure S3E:** Adjusted annualised AECOPD rates, stratified by severity, for patients with blood eosinophil counts <3% of the total white blood cell count, between Prednisone & Theophylline (PrT) and Pooled Placebo (PP) treatment groups.

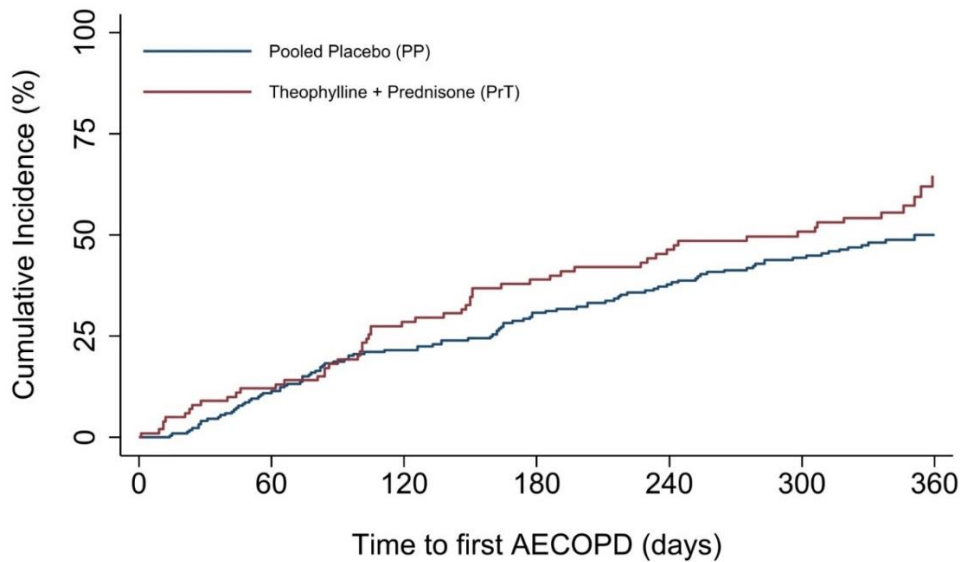

At Risk Count

|     |     |     |     |     |     |     |    |
|-----|-----|-----|-----|-----|-----|-----|----|
| PP  | 220 | 195 | 164 | 140 | 124 | 108 | 31 |
| PrT | 101 | 87  | 69  | 58  | 50  | 43  | 13 |

**Figure S4A:** Time to first acute exacerbation of chronic obstructive pulmonary disease (AECOPD) of any severity in participants with blood eosinophil counts  $\geq 300$  cells/ $\mu$ L between Prednisone & Theophylline (PrT) and Pooled Placebo (PP) treatment groups.

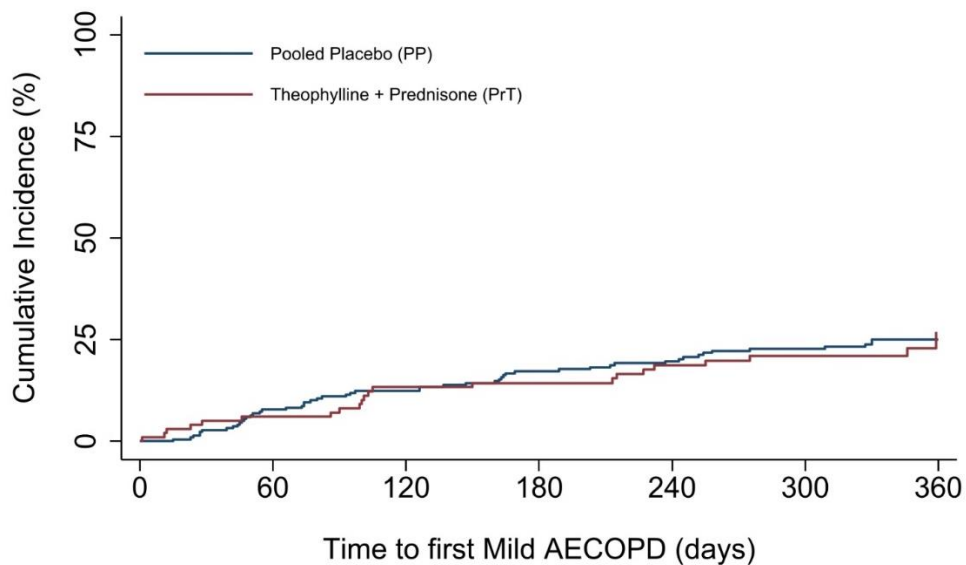

At Risk Count

|     |     |     |     |     |     |     |    |
|-----|-----|-----|-----|-----|-----|-----|----|
| PP  | 220 | 202 | 183 | 168 | 159 | 148 | 49 |
| PrT | 101 | 93  | 82  | 80  | 74  | 67  | 18 |

**Figure S4B:** Time to first mild acute exacerbation of chronic obstructive pulmonary disease (AECOPD) in participants with blood eosinophil counts  $\geq 300$  cells/ $\mu$ L between Prednisone & Theophylline (PrT) and Pooled Placebo (PP) treatment groups.

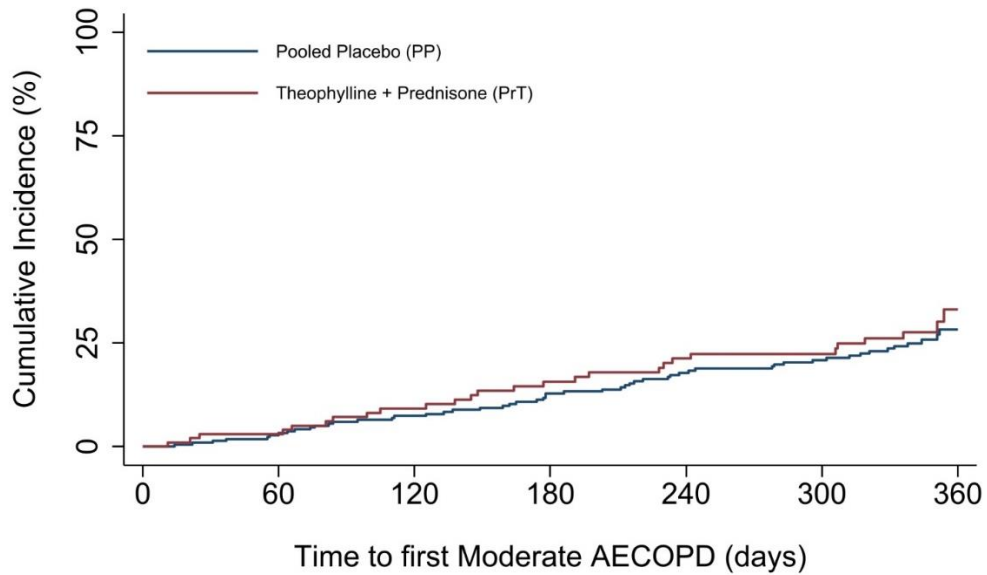

At Risk Count

|     |     |     |     |     |     |     |    |
|-----|-----|-----|-----|-----|-----|-----|----|
| PP  | 220 | 212 | 193 | 176 | 162 | 149 | 46 |
| PrT | 101 | 96  | 85  | 77  | 69  | 63  | 18 |

**Figure S4C:** Time to first moderate acute exacerbation of chronic obstructive pulmonary disease (AECOPD) in participants with blood eosinophil counts  $\geq 300$  cells/ $\mu$ L between Prednisone & Theophylline (PrT) and Pooled Placebo (PP) treatment groups.

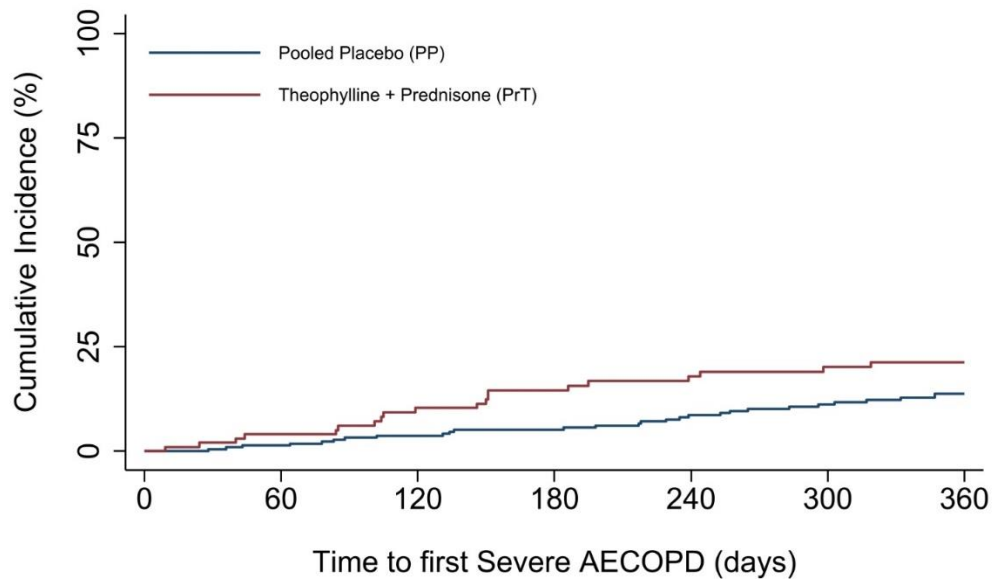

At Risk Count

|     |     |     |     |     |     |     |    |
|-----|-----|-----|-----|-----|-----|-----|----|
| PP  | 220 | 215 | 202 | 193 | 182 | 170 | 52 |
| PrT | 101 | 95  | 84  | 78  | 74  | 69  | 24 |

**Figure S4D:** Time to first severe acute exacerbation of chronic obstructive pulmonary disease (AECOPD) in participants with blood eosinophil counts  $\geq 300$  cells/ $\mu$ L between Prednisone & Theophylline (PrT) and Pooled Placebo (PP) treatment groups.

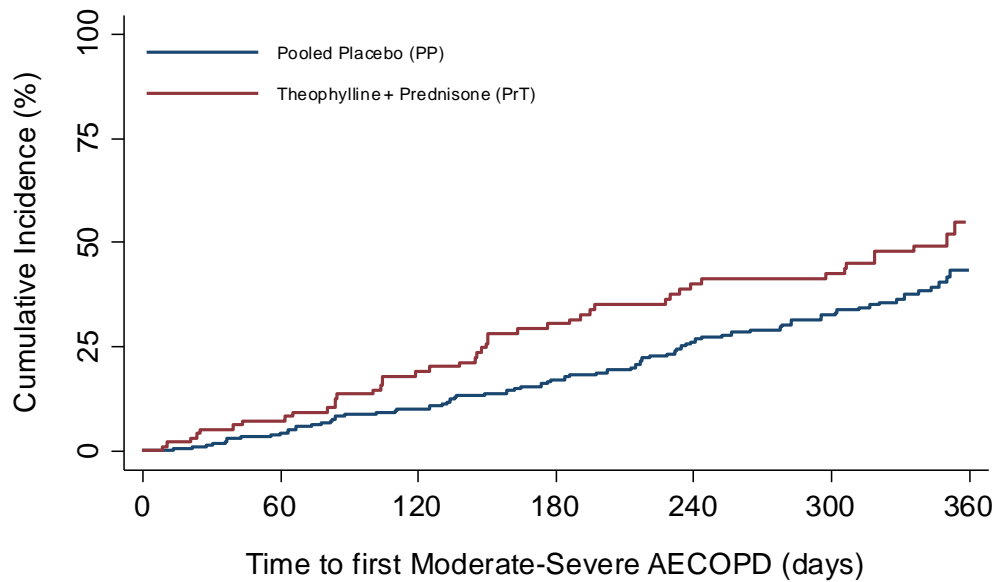

At Risk Count

|     |     |     |     |     |     |     |    |
|-----|-----|-----|-----|-----|-----|-----|----|
| PP  | 220 | 201 | 173 | 150 | 131 | 115 | 31 |
| PrT | 101 | 89  | 72  | 60  | 50  | 44  | 13 |

**Figure S5A:** Time to first moderate-severe acute exacerbation of chronic obstructive pulmonary disease (AECOPD) in participants with blood eosinophil counts  $\geq 150$  cells/ $\mu\text{L}$  between Prednisone & Theophylline (PrT) and Pooled Placebo (PP) treatment groups.

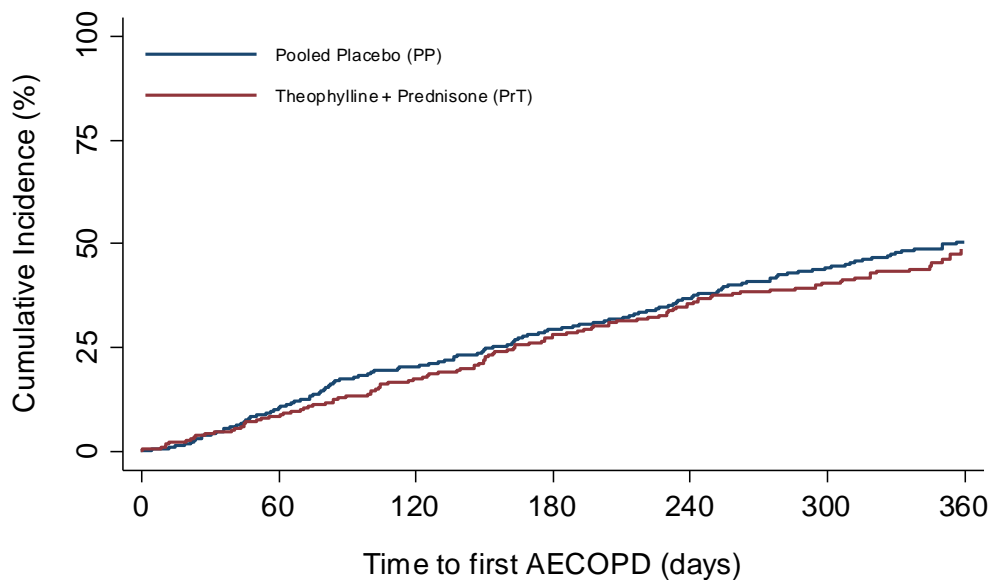

At Risk Count

|     |     |     |     |     |     |     |    |
|-----|-----|-----|-----|-----|-----|-----|----|
| PP  | 504 | 454 | 385 | 334 | 291 | 241 | 68 |
| PrT | 256 | 233 | 203 | 176 | 154 | 133 | 39 |

**Figure S5B:** Time to first acute exacerbation of chronic obstructive pulmonary disease (AECOPD) of any severity in participants with blood eosinophil counts  $\geq 150$  cells/ $\mu\text{L}$  between Prednisone & Theophylline (PrT) and Pooled Placebo (PP) treatment groups.

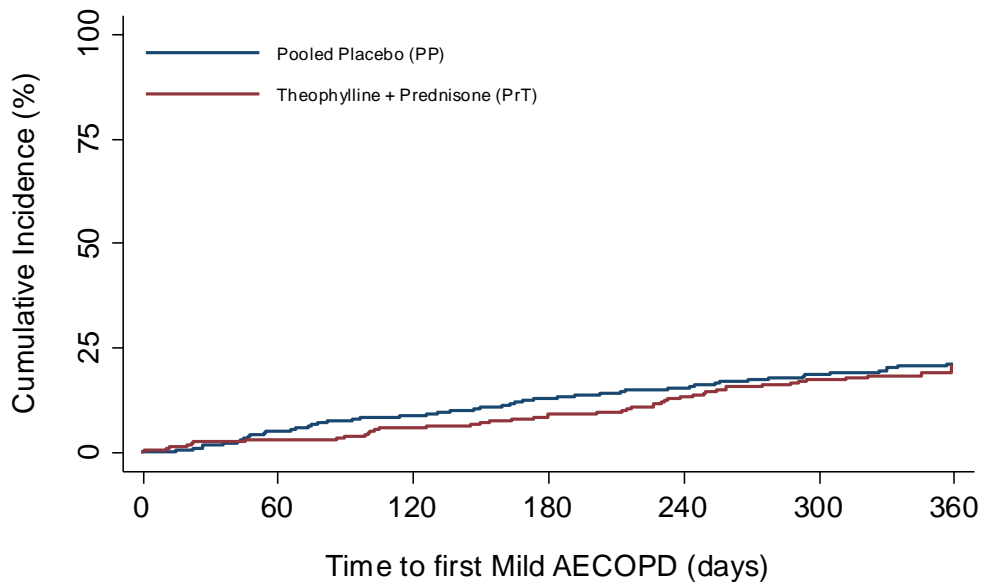

At Risk Count

|     |     |     |     |     |     |     |     |
|-----|-----|-----|-----|-----|-----|-----|-----|
| PP  | 504 | 476 | 438 | 407 | 382 | 345 | 113 |
| PrT | 256 | 246 | 230 | 220 | 205 | 182 | 52  |

**Figure S5C:** Time to first mild acute exacerbation of chronic obstructive pulmonary disease (AECOPD) in participants with blood eosinophil counts  $\geq 150$  cells/ $\mu\text{L}$  between Prednisone & Theophylline (PrT) and Pooled Placebo (PP) treatment groups.

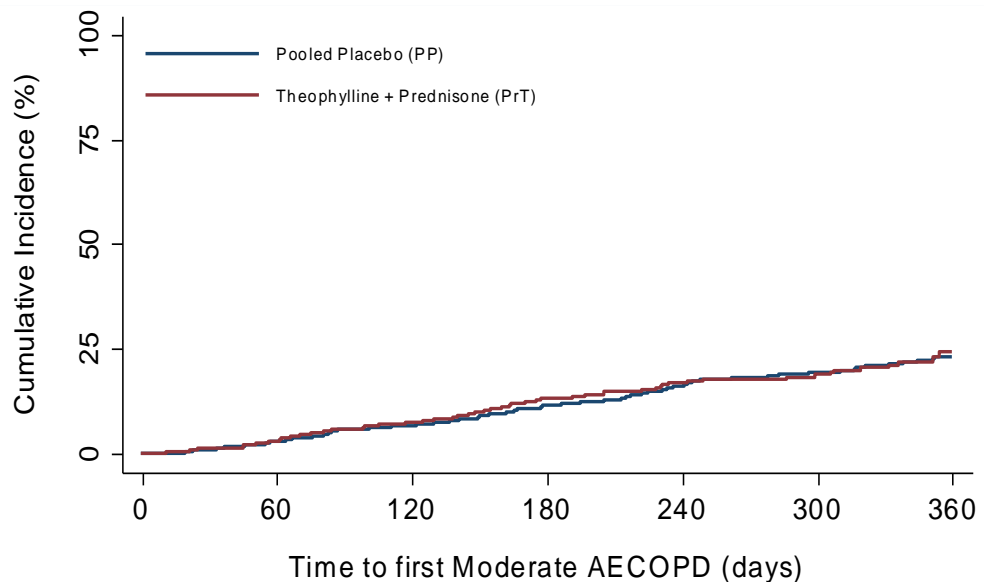

At Risk Count

|     |     |     |     |     |     |     |     |
|-----|-----|-----|-----|-----|-----|-----|-----|
| PP  | 505 | 487 | 446 | 413 | 379 | 340 | 114 |
| PrT | 258 | 248 | 227 | 208 | 194 | 177 | 49  |

**Figure S5D:** Time to first moderate acute exacerbation of chronic obstructive pulmonary disease (AECOPD) in participants with blood eosinophil counts  $\geq 150$  cells/ $\mu\text{L}$  between Prednisone & Theophylline (PrT) and Pooled Placebo (PP) treatment groups.

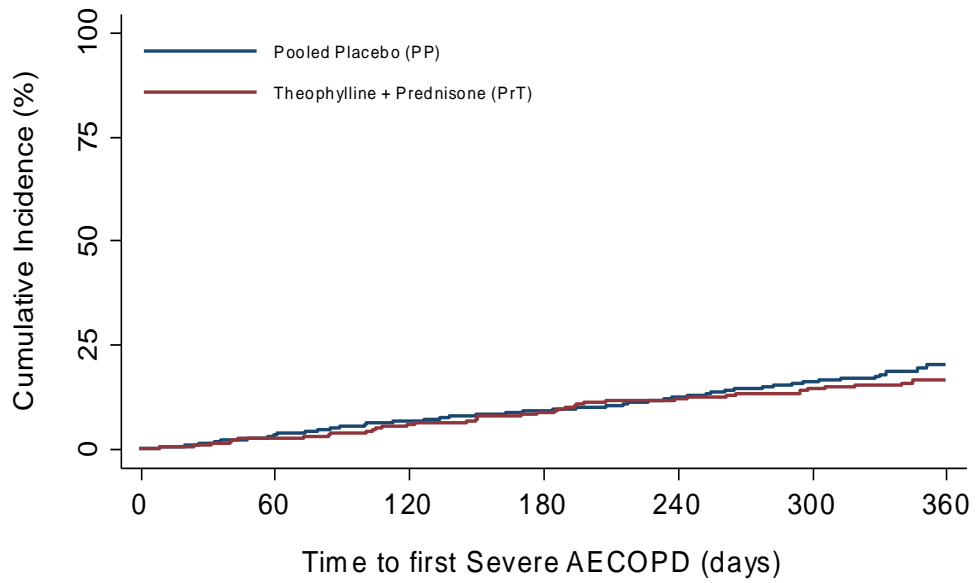

At Risk Count

|     |     |     |     |     |     |     |     |
|-----|-----|-----|-----|-----|-----|-----|-----|
| PP  | 505 | 488 | 449 | 428 | 401 | 362 | 114 |
| PrT | 258 | 250 | 231 | 220 | 209 | 193 | 60  |

**Figure S5E:** Time to first severe acute exacerbation of chronic obstructive pulmonary disease (AECOPD) in participants with blood eosinophil counts  $\geq 150$  cells/ $\mu\text{L}$  between Prednisone & Theophylline (PrT) and Pooled Placebo (PP) treatment groups.

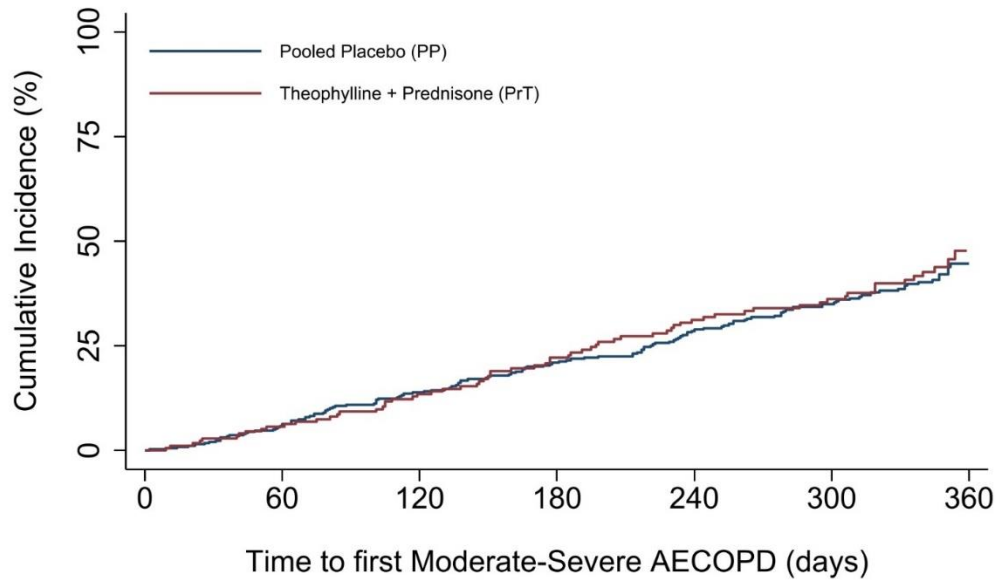

At Risk Count

|     |     |     |     |     |     |     |    |
|-----|-----|-----|-----|-----|-----|-----|----|
| PP  | 386 | 351 | 297 | 259 | 221 | 185 | 52 |
| PrT | 179 | 163 | 142 | 122 | 103 | 87  | 22 |

**Figure S6A:** Time to first moderate-severe acute exacerbation of chronic obstructive pulmonary disease (AECOPD) in participants with blood eosinophil counts  $\geq 3\%$  total white blood cell count between Prednisone & Theophylline (PrT) and Pooled Placebo (PP) treatment groups.

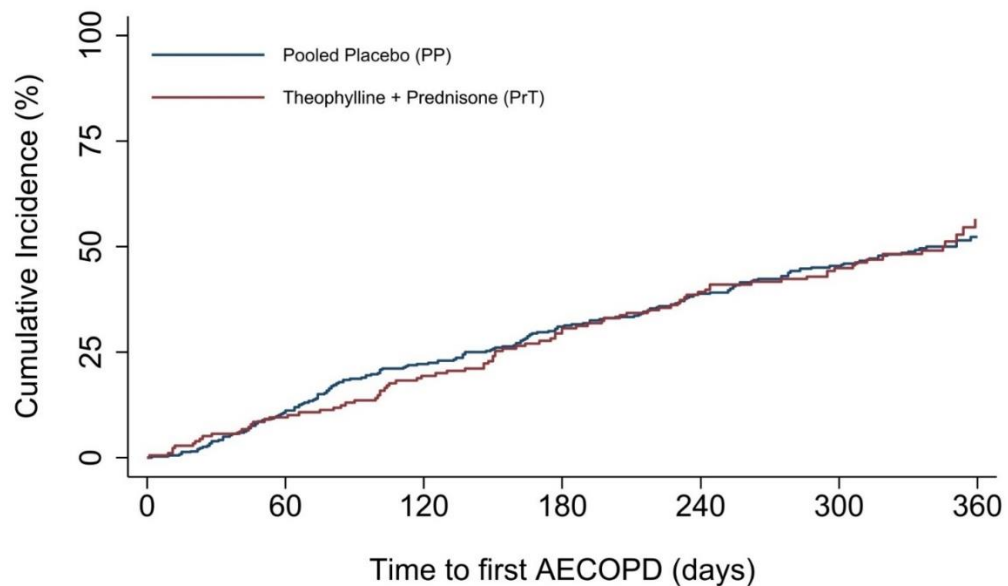

At Risk Count

|     |     |     |     |     |     |     |    |
|-----|-----|-----|-----|-----|-----|-----|----|
| PP  | 386 | 344 | 284 | 246 | 211 | 177 | 52 |
| PrT | 179 | 160 | 138 | 117 | 99  | 84  | 22 |

**Figure S6B:** Time to first acute exacerbation of chronic obstructive pulmonary disease (AECOPD) in participants with blood eosinophil counts  $\geq 3\%$  total white blood cell count between Prednisone & Theophylline (PrT) and Pooled Placebo (PP) treatment groups.

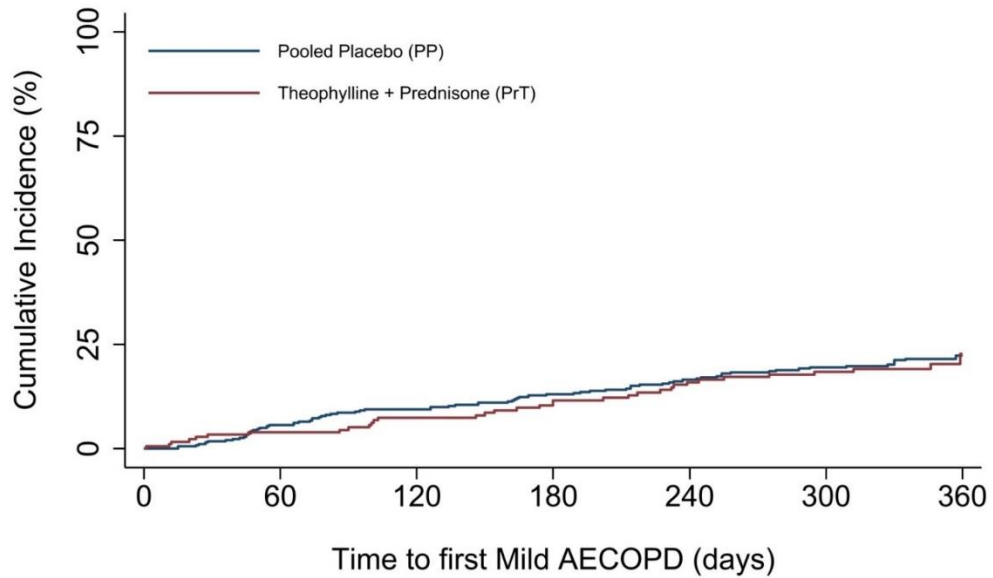

At Risk Count

|     |     |     |     |     |     |     |    |
|-----|-----|-----|-----|-----|-----|-----|----|
| PP  | 386 | 362 | 330 | 308 | 284 | 258 | 87 |
| PrT | 179 | 170 | 158 | 148 | 136 | 122 | 32 |

**Figure S6C:** Time to first mild acute exacerbation of chronic obstructive pulmonary disease (AECOPD) in participants with blood eosinophil counts  $\geq 3\%$  total white blood cell count between Prednisone & Theophylline (PrT) and Pooled Placebo (PP) treatment groups.

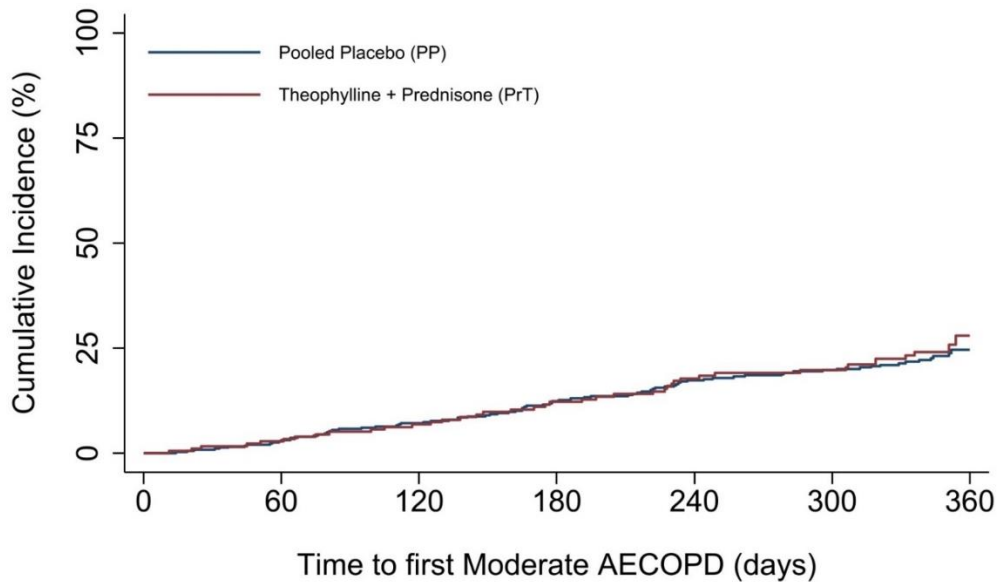

At Risk Count

|     |     |     |     |     |     |     |    |
|-----|-----|-----|-----|-----|-----|-----|----|
| PP  | 386 | 372 | 337 | 309 | 281 | 255 | 86 |
| PrT | 180 | 173 | 158 | 143 | 130 | 118 | 29 |

**Figure S6D:** Time to first moderate acute exacerbation of chronic obstructive pulmonary disease (AECOPD) in participants with blood eosinophil counts  $\geq 3\%$  total white blood cell count



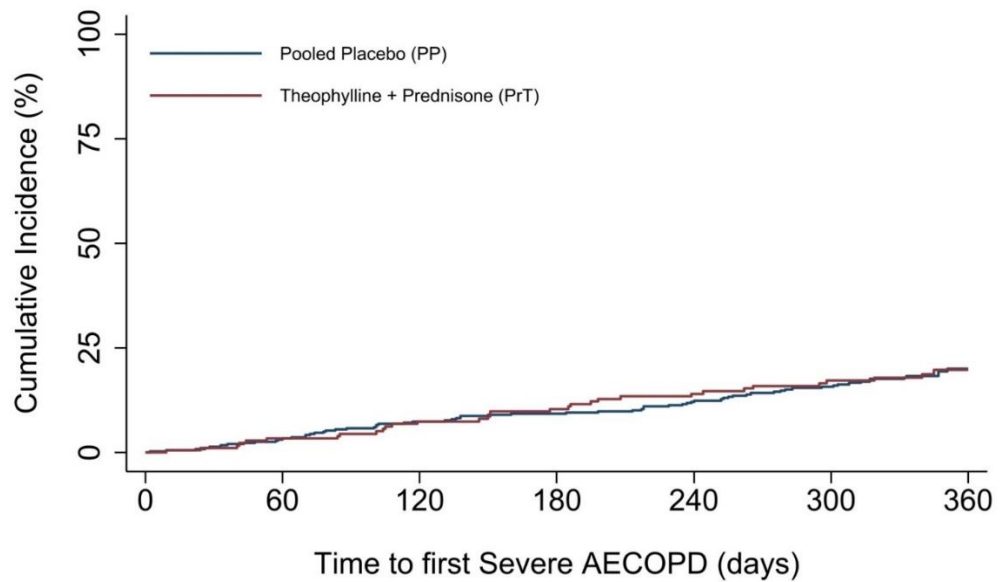

At Risk Count

|     |     |     |     |     |     |     |    |
|-----|-----|-----|-----|-----|-----|-----|----|
| PP  | 386 | 372 | 339 | 324 | 303 | 273 | 88 |
| PrT | 180 | 172 | 158 | 148 | 140 | 128 | 37 |

**Figure S6E:** Time to first severe acute exacerbation of chronic obstructive pulmonary disease (AECOPD) in participants with blood eosinophil counts  $\geq 3\%$  total white blood cell count

**Table S1A:** Association of Pooled Placebo (PP) and Prednisone and theophylline (PrT) study groups with secondary outcomes at study completion in participants (n=638) with blood eosinophil counts  $\geq 150$  cells/ $\mu$ L

|                                              | Pooled Placebo<br>(n=428)    | Prednisone &<br>theophylline (n=220) | Coefficient                | P-Val |
|----------------------------------------------|------------------------------|--------------------------------------|----------------------------|-------|
| <b>CAT Mean<sup>A</sup> Score<br/>Change</b> | -3.18<br>(-4.51 – -1.85)     | -3.19<br>(-4.60 – -1.78)             | -0.01<br>(-0.93 – 0.91)    | 0.984 |
| <b>SGRQ Mean Score<br/>Change</b>            |                              |                                      |                            |       |
| <i>Total</i>                                 | -8.370<br>(-12.099 – -4.640) | -10.388<br>(-14.467 – -6.309)        | -2.019<br>(-5.255 – 1.218) | 0.222 |
| <i>Symptom</i>                               | -8.005<br>(-11.629 – -4.381) | -8.459<br>(-12.694 – -4.224)         | -0.454<br>(-4.558 – 3.650) | 0.828 |
| <i>Activity</i>                              | -6.325<br>(-9.515 – -3.135)  | -6.526<br>(-10.167 – -2.885)         | -0.201<br>(-3.504 – 3.101) | 0.905 |
| <i>Impact</i>                                | -6.909<br>(-10.953 – -2.866) | -9.914<br>(-13.357 – -4.472)         | -2.005<br>(-5.545 – 1.535) | 0.267 |
| <b>Spirometry Mean<br/>Change</b>            |                              |                                      |                            |       |
| <i>FEV1 (L)</i>                              | -0.01<br>(-0.04 – 0.02)      | -0.003<br>(-0.04 – 0.03)             | 0.010<br>(-0.03 – 0.05)    | 0.622 |
| <i>FEV1 (%Predicted)<sup>B</sup></i>         | -0.30<br>(-2.36 – 1.76)      | -1.27<br>(-3.86 – 1.32)              | -0.96<br>(-3.70 – 1.77)    | 0.490 |
| <i>FVC (L)</i>                               | -0.06<br>(-0.13 – 0.02)      | -0.02<br>(-0.10 – 0.07)              | 0.04<br>(-0.03 – 0.12)     | 0.276 |
| <i>FVC (%Predicted)</i>                      | -1.65<br>(-4.14 – 0.83)      | 0.21<br>(-2.56 – 2.98)               | 1.86<br>(-0.55 – 4.23)     | 0.130 |
| <i>FEV1/FVC (%)</i>                          | -0.013<br>(-0.043 – 0.017)   | -0.003<br>(-0.040 – 0.033)           | -0.18<br>(-1.58 – 1.21)    | 0.796 |

<sup>A</sup> All means derived from marginal means

<sup>B</sup> Percentage point change

**Table S1B:** Association of Pooled Placebo (PP) and Prednisone and theophylline (PrT) study groups with secondary outcomes at study completion in participants with blood eosinophil counts  $\geq 3\%$  total white blood cell count

|                                              | Pooled Placebo<br>(n=347)    | Prednisone &<br>theophylline<br>(n=163) | Coefficient                | P-Val |
|----------------------------------------------|------------------------------|-----------------------------------------|----------------------------|-------|
| <b>CAT Mean<sup>A</sup> Score<br/>Change</b> | -3.21<br>(-4.59 – -1.83)     | -3.15<br>(-4.67 – -1.62)                | 0.07<br>(-1.05 – 1.19)     | 0.906 |
| <b>SGRQ Mean Score<br/>Change</b>            |                              |                                         |                            |       |
| <i>Total</i>                                 | -8.370<br>(-12.099 – -4.640) | -10.388<br>(-14.467 – -6.309)           | -2.019<br>(-5.255 – 1.218) | 0.222 |
| <i>Symptom</i>                               | -8.005<br>(-11.629 – -4.381) | -8.459<br>(-12.694 – -4.224)            | -0.454<br>(-4.558 – 3.650) | 0.828 |
| <i>Activity</i>                              | -6.325<br>(-9.515 – -3.135)  | -6.526<br>(-10.167 – -2.885)            | -0.201<br>(-3.504 – 3.101) | 0.905 |
| <i>Impact</i>                                | -6.909<br>(-10.953 – -2.866) | -9.914<br>(-13.357 – -4.472)            | -2.005<br>(-5.545 – 1.535) | 0.267 |
| <b>Spirometry Mean<br/>Change</b>            |                              |                                         |                            |       |
| <i>FEV1 (L)</i>                              | -0.015<br>(-0.049 – 0.019)   | 0.001<br>(-0.04 – 0.045)                | 0.02<br>(-0.03 – 0.05)     | 0.501 |
| <i>FEV1 (%Predicted)<sup>B</sup></i>         | 0.008<br>(-1.371 – 1.387)    | -0.049<br>(-1.882 – 1.783)              | -0.06<br>(-2.092 – 1.978)  | 0.956 |
| <i>FVC (L)</i>                               | -0.040<br>(-0.120 – 0.040)   | -0.005<br>(-0.10 – 0.07)                | 0.03<br>(-0.06 – 0.12)     | 0.454 |
| <i>FVC (%Predicted)</i>                      | -1.388<br>(-4.074 – 1.296)   | -0.083<br>(-3.205 – 3.040)              | 1.31<br>(-1.53 – 4.14)     | 0.367 |
| <i>FEV1/FVC (%)</i>                          | 0.705<br>(-0.810 – 2.221)    | 0.782<br>(-1.023 – 2.586)               | 0.076<br>(-1.62 – 1.78)    | 0.930 |

<sup>A</sup> All means derived from marginal means

<sup>B</sup> Percentage point change

**Table S2A:** Comparison of eosinophilic status (<300 cells/μL of blood vs ≥300 cells/μL of blood) and their association with annualised exacerbation rate within the Pooled Placebo (PP) arm (n = for <300; n = for ≥300) of the TASCs trial

| <b>Event Type</b> | <b>Incidence Rate Ratio <sup>A</sup></b> | <b>Confidence Interval (95%)</b> | <b>P-Value</b> |
|-------------------|------------------------------------------|----------------------------------|----------------|
| Overall           | 0.98                                     | 0.80 – 1.19                      | 0.817          |
| Moderate-Severe   | 0.92                                     | 0.73 – 1.17                      | 0.506          |
| Mild              | 1.14                                     | 0.82 – 1.60                      | 0.438          |
| Moderate          | 1.08                                     | 0.80 – 1.46                      | 0.619          |
| Severe            | 0.71                                     | 0.48 – 1.06                      | 0.091          |

<sup>A</sup> <300 cells/μL group coded as 0 in the eosinophilic status (<300 cells/μL of blood vs ≥300 cells/μL of blood) dummy variable

**Table S2B:** Comparison of eosinophilic status (<300 cells/μL of blood vs ≥300 cells/μL of blood) and their association with annualised exacerbation rate within the combination Prednisone and Theophylline (PrT) arm of the TASCs trial

| <b>Event Type</b> | <b>Incidence Rate Ratio <sup>A</sup></b> | <b>Confidence Interval (95%)</b> | <b>P-Value</b> |
|-------------------|------------------------------------------|----------------------------------|----------------|
| Overall           | 1.56                                     | 1.20 – 2.04                      | 0.001          |
| Moderate-Severe   | 1.56                                     | 1.15 – 2.12                      | 0.005          |
| Mild              | 1.63                                     | 0.98 – 2.72                      | 0.061          |
| Moderate          | 1.45                                     | 0.98 – 2.14                      | 0.061          |
| Severe            | 1.71                                     | 1.02 – 2.88                      | 0.042          |

<sup>A</sup> <300 cells/μL group coded as 0 in the eosinophilic status (<300 cells/μL of blood vs ≥300 cells/μL of blood) dummy variable

**Table S3A:** Univariate predictor analysis of all baseline participant characteristics and their predictive power for continuous blood eosinophil count

| Baseline Variable                                 | Regression Coefficient<br>(95% CI) | Standard Error | t-Value | P-Value |
|---------------------------------------------------|------------------------------------|----------------|---------|---------|
| Allocated Prednisone + Theophylline               | -0.041 (-0.108 – 0.026)            | 0.034          | -1.20   | 0.228   |
| From Metropolitan Region                          | 0.054 (-0.009 – 0.118)             | 0.032          | 1.68    | 0.093   |
| Male Sex                                          | 0.074 (0.0002 – 0.148)             | 0.038          | 1.97    | 0.049   |
| Age                                               | -0.003 (-0.007 – 0.001)            | 0.002          | -1.33   | 0.182   |
| Body Mass Index                                   | 0.005 (-0.004 – 0.014)             | 0.005          | 0.99    | 0.321   |
| Is a current/former smoker                        | 0.042 (-0.029 – 0.114)             | 0.036          | 1.16    | 0.244   |
| Had Biomass Exposure                              | -0.011 (-0.076 – 0.054)            | 0.033          | -0.33   | 0.739   |
| Had Dust Exposure                                 | 0.027 (-0.056 – 0.110)             | 0.042          | 0.64    | 0.525   |
| Post-BD FEV <sub>1</sub> Value (L) <sup>a,b</sup> | 0.088 (0.013 – 0.163)              | 0.038          | 2.30    | 0.022   |
| Post-BD FEV <sub>1</sub> Value (%predicted)       | 0.018 (-0.003 – 0.039)             | 0.011          | 1.70    | 0.090   |
| Pre-Post FEV <sub>1</sub> change (ml)             | 0.025 (0.001 – 0.049)              | 0.012          | 2.00    | 0.046   |
| Post-BD FEV <sub>1</sub> /FVC Ratio <sup>c</sup>  | -0.001 (-0.004 – 0.002)            | 0.001          | -0.60   | 0.552   |
| Post-BD FVC Value (L)                             | 0.067 (0.025 – 0.109)              | 0.021          | 3.13    | 0.002   |
| Post-BD FVC Value (%predicted)                    | 0.002 (0.001 – 0.004)              | 0.001          | 2.65    | 0.008   |
| Past Asthma Dx                                    | 0.020 (-0.110 – 0.149)             | 0.066          | 0.30    | 0.764   |
| Systolic Blood Pressure                           | 0.0001 (-0.002 – 0.002)            | 0.001          | 0.11    | 0.916   |
| Diastolic Blood Pressure                          | 0.002 (-0.002 – 0.005)             | 0.002          | 0.99    | 0.322   |
| Heart Rate                                        | -0.002 (-0.005 – 0.0004)           | 0.001          | -1.70   | 0.090   |
| Respiration Rate                                  | -0.002 (-0.016 – 0.012)            | 0.007          | -0.32   | 0.746   |
| mMRC Dyspnoea Score <sup>d</sup>                  | -0.008 (-0.044 – 0.027)            | 0.018          | -0.47   | 0.637   |
| CAT Score <sup>e</sup>                            | 0.003 (-0.002 – 0.007)             | 0.002          | 1.15    | 0.25    |
| SGRQ - Total Score <sup>f</sup>                   | 0.001 (-0.001 – 0.003)             | 0.001          | 1.22    | 0.222   |
| SGRQ - Active Score                               | 0.002 (0.0001 – 0.003)             | 0.001          | 2.03    | 0.042   |
| SGRQ - Symptom Score                              | 0.001 (0.00002 – 0.003)            | 0.001          | 1.99    | 0.046   |
| SGRQ - Impact Score                               | 0.0002 (-0.001 – 0.002)            | 0.001          | 0.25    | 0.799   |
| Blood Creatinine                                  | 0.002 (0.0001 – 0.004)             | 0.001          | 1.86    | 0.063   |
| Blood Glucose                                     | -0.001 (-0.027 – 0.026)            | 0.013          | -0.04   | 0.969   |
| Blood ALT level <sup>g</sup>                      | 0.001 (-0.002 – 0.003)             | 0.001          | 0.47    | 0.635   |
| Blood AST <sup>h</sup>                            | 0.003 (-0.0004 – 0.006)            | 0.002          | 1.70    | 0.089   |
| Blood Sodium                                      | -0.001 (-0.013 – 0.010)            | 0.006          | -0.25   | 0.800   |
| Blood White Blood Cell Count                      | 0.023 (0.019 – 0.026)              | 0.002          | 12.93   | <0.001  |
| Blood Monocyte Count                              | 0.174 (0.148 – 0.201)              | 0.014          | 12.72   | <0.001  |
| Blood Lymphocyte Count                            | 0.057 (0.047 – 0.067)              | 0.005          | 10.97   | <0.001  |
| Blood Neutrophil Count                            | 0.016 (0.010 – 0.021)              | 0.003          | 5.97    | <0.001  |
| Blood Platelet Count                              | -0.0001 (-0.001 – 0.0003)          | 0.0002         | -0.54   | 0.588   |
| Blood Haematocrit                                 | 0.001 (-0.002 – 0.002)             | 0.001          | 0.45    | 0.656   |

<sup>a</sup> BD, bronchodilator; <sup>b</sup> FEV<sub>1</sub>, forced expiratory volume – 1 second; <sup>c</sup> FVC, forced vital capacity; <sup>d</sup> mMRC, modified medical research council; <sup>e</sup> CAT, COPD Assessment Test; <sup>f</sup> SGRQ, St. George's Respiratory Questionnaire; <sup>g</sup> ALT, Alanine transaminase; <sup>h</sup> AST, Aspartate transaminase

**Table S3B:** Univariate predictor analysis of all baseline participant characteristics and their predictive power for a blood eosinophil count  $\geq 300$  cells/ $\mu$ L

| Baseline Variable                                 | Regression Coefficient<br>(95% CI) | Standard Error | t-Value | P-Value |
|---------------------------------------------------|------------------------------------|----------------|---------|---------|
| Allocated Prednisone + Theophylline               | -0.125 (-0.390 – 0.139)            | 0.135          | -0.93   | 0.353   |
| From Metropolitan Region                          | 0.046 (-0.203 – 0.294)             | 0.127          | 0.36    | 0.719   |
| Male Sex                                          | 0.410 (0.098 – 0.721)              | 0.159          | 2.58    | 0.01    |
| Age                                               | -0.010 (-0.025 – 0.006)            | 0.008          | -1.22   | 0.221   |
| Body Mass Index                                   | 0.047 (0.012 – 0.082)              | 0.018          | 2.61    | 0.009   |
| Is a current/former smoker                        | 0.164 (-0.122 – 0.449)             | 0.146          | 1.12    | 0.262   |
| Had Biomass Exposure                              | -0.231 (-0.489 – 0.027)            | 0.132          | -1.75   | 0.08    |
| Had Dust Exposure                                 | 0.215 (-0.097 – 0.527)             | 0.159          | 1.35    | 0.177   |
| Post-BD FEV <sub>1</sub> Value (L) <sup>a,b</sup> | 0.068 (0.018 – 0.119)              | 0.026          | 2.66    | 0.008   |
| Post-BD FEV <sub>1</sub> Value (%predicted)       | 0.068 (-0.013 – 0.148)             | 0.041          | 1.64    | 0.1     |
| Pre-Post FEV <sub>1</sub> change (ml)             | 0.095 (0.001 – 0.188)              | 0.048          | 1.97    | 0.048   |
| Post-BD FEV <sub>1</sub> /FVC Ratio <sup>c</sup>  | -0.007 (-0.019 – 0.004)            | 0.006          | -1.27   | 0.205   |
| Post-BD FVC Value (L)                             | 0.356 (0.195 – 0.517)              | 0.082          | 4.33    | <0.001  |
| Post-BD FVC Value (%predicted)                    | 0.002 (0.0005 – 0.003)             | 0.0006         | 2.84    | 0.005   |
| Past Asthma Dx                                    | 0.095 (-0.400 – 0.589)             | 0.252          | 0.38    | 0.708   |
| Systolic Blood Pressure                           | -0.002(-0.009 – 0.006)             | 0.004          | -0.42   | 0.671   |
| Diastolic Blood Pressure                          | 0.006 (-0.006 – 0.019)             | 0.006          | 0.97    | 0.33    |
| Heart Rate                                        | -0.006 (-0.017 – 0.006)            | 0.006          | -1.00   | 0.316   |
| Respiration Rate                                  | -0.080 (-0.134 – -0.027)           | 0.027          | -2.93   | 0.003   |
| mMRC Dyspnoea Score <sup>d</sup>                  | -0.002 (-0.140 – 0.135)            | 0.070          | -0.03   | 0.974   |
| CAT Score <sup>e</sup>                            | 0.003 (-0.014 – 0.020)             | 0.009          | 0.37    | 0.709   |
| SGRQ - Total Score <sup>f</sup>                   | 0.0003 (-0.006 – 0.006)            | 0.003          | 0.08    | 0.935   |
| SGRQ - Active Score                               | 0.003 (-0.004 – 0.009)             | 0.003          | 0.83    | 0.405   |
| SGRQ - Symptom Score                              | -0.001 (-0.006 – 0.004)            | 0.003          | -0.43   | 0.665   |
| SGRQ - Impact Score                               | -0.0005(-0.006 0.005)              | 0.003          | -0.18   | 0.857   |
| Blood Creatinine                                  | 0.009 (0.002 – 0.016)              | 0.004          | 2.49    | 0.013   |
| Blood Glucose                                     | -0.011 (-0.122 – 0.101)            | 0.057          | -0.19   | 0.851   |
| Blood ALT level <sup>g</sup>                      | -0.003 (-0.01319 – 0.007)          | 0.005          | -0.64   | 0.519   |
| Blood AST <sup>h</sup>                            | 0.005 (-0.007 – 0.018)             | 0.006          | 0.88    | 0.38    |
| Blood Sodium                                      | -0.009 (-0.053 – 0.036)            | 0.023          | -0.38   | 0.701   |
| Blood White Blood Cell Count                      | 0.038 (0.020 – 0.055)              | 0.009          | 4.22    | <0.001  |
| Blood Monocyte Count                              | 0.224 (0.128 – 0.319)              | 0.049          | 4.60    | <0.001  |
| Blood Lymphocyte Count                            | 0.277 (0.127 – 0.426)              | 0.076          | 3.63    | <0.001  |
| Blood Neutrophil Count                            | 0.021 (0.004 – 0.039)              | 0.009          | 2.39    | 0.017   |
| Blood Platelet Count                              | 0.002 (-0.0002 – 0.003)            | 0.0009         | 1.79    | 0.073   |
| Blood Haematocrit                                 | 0.006 (-0.002 – 0.014)             | 0.004          | 1.51    | 0.13    |

<sup>a</sup> BD, bronchodilator; <sup>b</sup> FEV<sub>1</sub>, forced expiratory volume – 1 second; <sup>c</sup> FVC, forced vital capacity; <sup>d</sup> mMRC, modified medical research council; <sup>e</sup> CAT, COPD Assessment Test; <sup>f</sup> SGRQ, St. George's Respiratory Questionnaire; <sup>g</sup> ALT, Alanine transaminase; <sup>h</sup> AST, Aspartate transaminase

**Table S3C:** Univariate predictor analysis of all baseline participant characteristics and their predictive power for a blood eosinophil count  $\geq 150$  cells/ $\mu\text{L}$

| Baseline Variable                                 | Regression Coefficient<br>(95% CI) | Standard Error | t-Value | P-Value |
|---------------------------------------------------|------------------------------------|----------------|---------|---------|
| Allocated Prednisone + Theophylline               | 0.027 (-0.189 – 0.243)             | 0.110          | 0.24    | 0.808   |
| From Metropolitan Region                          | 0.205 (-0.001 – 0.410)             | 0.105          | 1.95    | 0.051   |
| Male Sex                                          | 0.294 (0.054 – 0.534)              | 0.123          | 2.4     | 0.016   |
| Age                                               | 0.0003 (-0.013 – 0.013)            | 0.007          | 0.05    | 0.96    |
| Body Mass Index                                   | 0.015 (-0.014 – 0.045)             | 0.015          | 1.03    | 0.305   |
| Is a current/former smoker                        | 0.209 (-0.022 – 0.440)             | 0.118          | 1.78    | 0.076   |
| Had Biomass Exposure                              | -0.138 (-0.348 – 0.072)            | 0.107          | -1.29   | 0.198   |
| Had Dust Exposure                                 | 0.118 (-0.150 – 0.387)             | 0.137          | 0.86    | 0.388   |
| Post-BD FEV <sub>1</sub> Value (L) <sup>a,b</sup> | 0.041 (-0.019 – 0.102)             | 0.031          | 1.33    | 0.182   |
| Post-BD FEV <sub>1</sub> Value (%predicted)       | 0.010 (-0.058 – 0.078)             | 0.035          | 0.29    | 0.771   |
| Pre-Post FEV <sub>1</sub> change (ml)             | 0.047 (-0.033 – 0.126)             | 0.040          | 1.16    | 0.247   |
| Post-BD FEV <sub>1</sub> /FVC Ratio <sup>c</sup>  | -0.004 (-0.013 – 0.005)            | 0.005          | -0.88   | 0.379   |
| Post-BD FVC Value (L)                             | 0.152 (0.014 – 0.288)              | 0.070          | 2.16    | 0.031   |
| Post-BD FVC Value (%predicted)                    | 0.0004 (-0.001 – 0.002)            | 0.0007         | 0.55    | 0.581   |
| Past Asthma Dx                                    | 0.273 (-0.150 – 0.697)             | 0.216          | 1.27    | 0.206   |
| Systolic Blood Pressure                           | 0.002 (-0.004 – 0.009)             | 0.003          | 0.75    | 0.456   |
| Diastolic Blood Pressure                          | 0.009 (-0.002 – 0.019)             | 0.005          | 1.65    | 0.1     |
| Heart Rate                                        | -0.001 (-0.010 – 0.009)            | 0.005          | -0.11   | 0.915   |
| Respiration Rate                                  | -0.019 (-0.064 – 0.026)            | 0.023          | -0.82   | 0.415   |
| mMRC Dyspnoea Score <sup>d</sup>                  | -0.064 (-0.177 – 0.050)            | 0.058          | -1.1    | 0.272   |
| CAT Score <sup>e</sup>                            | -0.011 (-0.025 – 0.003)            | 0.007          | -1.56   | 0.118   |
| SGRQ - Total Score <sup>f</sup>                   | 0.0003 (-0.005 – 0.005)            | 0.003          | 0.12    | 0.901   |
| SGRQ - Active Score                               | 0.0004 (-0.005 – 0.006)            | 0.003          | 0.14    | 0.891   |
| SGRQ - Symptom Score                              | -0.0012 (-0.005 – 0.003)           | 0.002          | -0.55   | 0.584   |
| SGRQ - Impact Score                               | 0.0007 (-0.004 – 0.005)            | 0.002          | 0.30    | 0.768   |
| Blood Creatinine                                  | 0.009 (0.003 – 0.015)              | 0.003          | 2.81    | 0.005   |
| Blood Glucose                                     | 0.020 (-0.071 – 0.111)             | 0.046          | 0.43    | 0.667   |
| Blood ALT level <sup>g</sup>                      | 0.001 (-0.007 – 0.008)             | 0.004          | 0.13    | 0.9     |
| Blood AST <sup>h</sup>                            | 0.013 (0.002 – 0.024)              | 0.006          | 2.3     | 0.022   |
| Blood Sodium                                      | -0.017 (-0.054 – 0.019)            | 0.019          | -0.93   | 0.353   |
| Blood White Blood Cell Count                      | 0.025 (0.006 – 0.043)              | 0.009          | 2.61    | 0.009   |
| Blood Monocyte Count                              | 0.192 (0.079 – 0.305)              | 0.058          | 3.34    | 0.001   |
| Blood Lymphocyte Count                            | 0.337 (0.178 – 0.497)              | 0.081          | 4.14    | <0.001  |
| Blood Neutrophil Count                            | 0.004 (-0.013 – 0.021)             | 0.009          | 0.45    | 0.652   |
| Blood Platelet Count                              | 0.001 (-0.0004 – 0.003)            | 0.001          | 1.42    | 0.155   |
| Blood Haematocrit                                 | -0.001 (-0.008 – 0.005)            | 0.003          | -0.33   | 0.744   |

<sup>a</sup> BD, bronchodilator; <sup>b</sup> FEV<sub>1</sub>, forced expiratory volume – 1 second; <sup>c</sup> FVC, forced vital capacity; <sup>d</sup> mMRC, modified medical research council; <sup>e</sup> CAT, COPD Assessment Test; <sup>f</sup> SGRQ, St. George's Respiratory Questionnaire; <sup>g</sup> ALT, Alanine transaminase; <sup>h</sup> AST, Aspartate transaminase

**Table S3D:** Univariate predictor analysis of all baseline participant characteristics and their predictive power for a blood eosinophil percentage  $\geq 3\%$  of the total white blood cell count

| Baseline Variable                                 | Regression Coefficient<br>(95% CI) | Standard Error | t-Value | P-Value |
|---------------------------------------------------|------------------------------------|----------------|---------|---------|
| Allocated Prednisone + Theophylline               | -0.112 (-0.335 – 0.111)            | 0.114          | -0.98   | 0.325   |
| From Metropolitan Region                          | 0.305 (0.093 – 0.517)              | 0.108          | 2.81    | 0.005   |
| Male Sex                                          | 0.347 (0.093 – 0.600)              | 0.129          | 2.68    | 0.007   |
| Age                                               | -0.0002 (-0.014 – 0.013)           | 0.007          | -0.03   | 0.974   |
| Body Mass Index                                   | -0.011 (-0.041 – 0.019)            | 0.015          | -0.71   | 0.479   |
| Is a current/former smoker                        | 0.116 (-0.122 – 0.355)             | 0.122          | 0.96    | 0.339   |
| Had Biomass Exposure                              | -0.110 (-0.326 – 0.106)            | 0.110          | -1.00   | 0.317   |
| Had Dust Exposure                                 | 0.255 (-0.016 – 0.526)             | 0.138          | 1.84    | 0.065   |
| Post-BD FEV <sub>1</sub> Value (L) <sup>a,b</sup> | 0.201 (-0.048 – 0.449)             | 0.127          | 1.58    | 0.114   |
| Post-BD FEV <sub>1</sub> Value (%predicted)       | 0.003 (-0.004 – 0.010)             | 0.004          | 0.74    | 0.462   |
| Pre-Post FEV <sub>1</sub> change (ml)             | 0.060 (-0.021 – 0.141)             | 0.041          | 1.44    | 0.149   |
| Post-BD FEV <sub>1</sub> /FVC Ratio <sup>c</sup>  | -0.004 (-0.013 – 0.006)            | 0.005          | -0.73   | 0.467   |
| Post-BD FVC Value (L)                             | 0.185 (0.045 – 0.324)              | 0.071          | 2.60    | 0.009   |
| Post-BD FVC Value (%predicted)                    | 0.003 (-0.002 – 0.009)             | 0.003          | 1.16    | 0.247   |
| Past Asthma Dx                                    | 0.091 (-0.335 – 0.517)             | 0.217          | 0.42    | 0.677   |
| Systolic Blood Pressure                           | -0.003 (-0.010 – 0.003)            | 0.003          | -1.04   | 0.297   |
| Diastolic Blood Pressure                          | -0.0002 (-0.011 – 0.010)           | 0.005          | -0.04   | 0.969   |
| Heart Rate                                        | -0.012 (-0.022 – -0.003)           | 0.005          | -2.49   | 0.013   |
| Respiration Rate                                  | -0.033 (-0.079 – 0.014)            | 0.024          | -1.38   | 0.168   |
| mMRC Dyspnoea Score <sup>d</sup>                  | -0.044 (-0.161 – 0.073)            | 0.060          | -0.73   | 0.464   |
| CAT Score <sup>e</sup>                            | -0.005 (-0.019 – 0.010)            | 0.007          | -0.62   | 0.534   |
| SGRQ - Total Score <sup>f</sup>                   | -0.002 (-0.008 – 0.003)            | 0.003          | -0.87   | 0.384   |
| SGRQ - Active Score                               | -0.004 (-0.007 – 0.004)            | 0.003          | -0.51   | 0.612   |
| SGRQ - Symptom Score                              | -0.003 (-0.007 – 0.002)            | 0.002          | -1.19   | 0.235   |
| SGRQ - Impact Score                               | -0.002 (-0.007 – 0.002)            | 0.002          | -1.02   | 0.308   |
| Blood Creatinine                                  | 0.010 (0.004 – 0.016)              | 0.003          | 3.10    | 0.002   |
| Blood Glucose                                     | -0.070 (-0.168 – 0.028)            | 0.050          | -1.40   | 0.162   |
| Blood ALT level <sup>g</sup>                      | -0.003 (-0.011 – 0.005)            | 0.004          | -0.68   | 0.493   |
| Blood AST <sup>h</sup>                            | 0.011 (-0.0003 – 0.021)            | 0.006          | 1.91    | 0.056   |
| Blood Sodium                                      | 0.008 (-0.030 – 0.046)             | 0.019          | 0.43    | 0.668   |
| Blood White Blood Cell Count                      | N/A                                | N/A            | N/A     | N/A     |
| Blood Monocyte Count                              | -0.030 (-0.127 – 0.066)            | 0.049          | -0.62   | 0.537   |
| Blood Lymphocyte Count                            | -0.008 (-0.045 – 0.029)            | 0.019          | -0.41   | 0.678   |
| Blood Neutrophil Count                            | -0.145 (-0.208 – -0.082)           | 0.032          | -4.53   | 0.000   |
| Blood Platelet Count                              | -0.002 (-0.004 – -0.0005)          | 0.0008         | -2.58   | 0.010   |
| Blood Haematocrit                                 | -0.002 (-0.009 – 0.004)            | 0.003          | -0.68   | 0.498   |

<sup>a</sup> BD, bronchodilator; <sup>b</sup> FEV<sub>1</sub>, forced expiratory volume – 1 second; <sup>c</sup> FVC, forced vital capacity; <sup>d</sup> mMRC, modified medical research council; <sup>e</sup> CAT, COPD Assessment Test; <sup>f</sup> SGRQ, St. George's Respiratory Questionnaire; <sup>g</sup> ALT, Alanine transaminase; <sup>h</sup> AST, Aspartate transaminase



**Table S4:** The Theophylline and steroids in chronic obstructive pulmonary disease study (TASCS) recruiting sites and principal investigators

| <b>Site</b>                                                                | <b>Site Principal Investigator</b> |
|----------------------------------------------------------------------------|------------------------------------|
| West China Hospital of Sichuan University                                  | Wen Fuqiang                        |
| The First Affiliated Hospital of Guangzhou Medical College                 | Zhong Nanshan                      |
| Beijing Chao-yang Hospital, Capital Medical University                     | Lin Yingxiang                      |
| Daping Hospital, 3rd Military Medical University                           | Cui Shehuai                        |
| The Military General Hospital of Chengdu PLA                               | Xiao Zhenliang                     |
| First Hospital of Jilin University                                         | Li Dan                             |
| People's Hospital of Henan Province                                        | Ma Lijun                           |
| The First Affiliated Hospital of Guangxi Medical University                | Zhong Xiaoning                     |
| Jiangsu Provincial Hospital of State Organ                                 | Liu Jiannan                        |
| The First Affiliated Hospital of Nanchang University                       | Zhang Wei                          |
| The Fourth Hospital of China Medical University                            | Wang Xiaoge                        |
| The First Affiliated Hospital of Baotou Medical College                    | He Huijie                          |
| Hejian Municipal People's Hospital                                         | Du Baoliang                        |
| Yutian County Hospital, Hebei Province                                     | Wang Jinchao                       |
| The First People's Hospital of Zunyi                                       | Liu Daishun                        |
| Leshan People's Hospital                                                   | Wei Maogang                        |
| Neijiang First People's Hospital                                           | Zhang Yong                         |
| Chengdu Second People's Hospital                                           | Yan Hao                            |
| Bazhong Central Hospital                                                   | Zhang Shiguo                       |
| Affiliated Hospital of North Sichuan Medical College                       | Chen Shaoping                      |
| Third People's Hospital of Mianyang                                        | Wang Kailv                         |
| Chengdu Fifth People's Hospital                                            | Wang Jun                           |
| The Nuclear Industry 416 Hospital                                          | Xiong Shuguang                     |
| The first people's hospital of Liangshan state                             | Li Li                              |
| Sichuan Mianyang 404 Hospital                                              | Wang Limin                         |
| Suining Central Hospital                                                   | He Zhengguang                      |
| Dazhou Central Hospital                                                    | Wang Hongjun                       |
| Chinese and Western medicine Hospital of Panzhihua                         | Hu Qiang                           |
| Yuxian People's Hospital                                                   | Guo Dongshuang                     |
| Pengzhou People's Hospital                                                 | Weng Bangqiong                     |
| Traditional Chinese Medicine Hospital Affiliated to Luzhou Medical College | Ao Suhua                           |
| People's hospital Changji Hui Autonomous Prefecture, Xinjia                | Guo Yang                           |
| Chengdu Qingbaijiang People's Hospital                                     | Liu Zehui                          |
| Wendeng Municipal hospital                                                 | Zhao Jinguo                        |
| Dong'e people's hospital, Shan Dong Province                               | Cui Jiadong                        |
| Henan Dancheng County People's Hospital                                    | Yang Yuwang                        |
| Jiangyou People's Hospital                                                 | Wang Jun                           |
